# Supplementary material for: Comparisons of Allergenic and Metazoan Parasite Proteins: Allergy the Price of Immunity
Source: PLoS Comput Biol. 2015 Oct 29;11(10):e1004546. doi: 10.1371/journal.pcbi.1004546 (PMC4626114; doi:10.1371/journal.pcbi.1004546)
Supplement: S1 Table — (XLS) [file pcbi.1004546.s001.xls]

## Sheet: Sheet1
Supporting information SI 1: Homologues of allergenic proteins belonging to families EF hand, CAP, Tropomysoin, Profilin, Lipocalin, Trypsin-like serine protease, Bet v 1, Cupin and Expansin in metazoan parasites (listed in separate sheets).
	Sr. No.	Uniprot accession code, Homolgues of allergenic protein (EF hand) in parasites	Organism
	1	Q967W0	Echinococcus granulosus (Hydatid tapeworm)
	2	P13566	Schistosoma mansoni (Blood fluke)
	3	P27730	Schistosoma mansoni (Blood fluke)
	4	Q07167	Schistosoma mansoni (Blood fluke)
	5	P15845	Schistosoma mansoni (Blood fluke)
	6	P32070	Schistosoma mansoni (Blood fluke)
	7	Q94743	Schistosoma japonicum (Blood fluke)
	8	P14202	Schistosoma mansoni (Blood fluke)
	9	H8XXX6	Echinococcus granulosus (Hydatid tapeworm)
	10	Q869D3	Echinococcus granulosus (Hydatid tapeworm)
	11	F1L8J7	Ascaris suum (Pig roundworm) (Ascaris lumbricoides)
	12	F1LFQ0	Ascaris suum (Pig roundworm) (Ascaris lumbricoides)
	13	F1LB89	Ascaris suum (Pig roundworm) (Ascaris lumbricoides)
	14	F1LA39	Ascaris suum (Pig roundworm) (Ascaris lumbricoides)
	15	F1L286	Ascaris suum (Pig roundworm) (Ascaris lumbricoides)
	16	F1L8L5	Ascaris suum (Pig roundworm) (Ascaris lumbricoides)
	17	F1L8H3	Ascaris suum (Pig roundworm) (Ascaris lumbricoides)
	18	F1KSU9	Ascaris suum (Pig roundworm) (Ascaris lumbricoides)
	19	F1L3G6	Ascaris suum (Pig roundworm) (Ascaris lumbricoides)
	20	F1LBG4	Ascaris suum (Pig roundworm) (Ascaris lumbricoides)
	21	F1L5H3	Ascaris suum (Pig roundworm) (Ascaris lumbricoides)
	22	F1LF05	Ascaris suum (Pig roundworm) (Ascaris lumbricoides)
	23	F1KZM0	Ascaris suum (Pig roundworm) (Ascaris lumbricoides)
	24	F1L7X3	Ascaris suum (Pig roundworm) (Ascaris lumbricoides)
	25	F1LF26	Ascaris suum (Pig roundworm) (Ascaris lumbricoides)
	26	Q867X8	Schistosoma japonicum (Blood fluke)
	27	C1LYI9	Schistosoma japonicum (Blood fluke)
	28	Q5BQX8	Schistosoma japonicum (Blood fluke)
	29	Q86FI4	Schistosoma japonicum (Blood fluke)
	30	Q86ES1	Schistosoma japonicum (Blood fluke)
	31	Q86EV1	Schistosoma japonicum (Blood fluke)
	32	Q5DEA5	Schistosoma japonicum (Blood fluke)
	33	C1L749	Schistosoma japonicum (Blood fluke)
	34	Q5DBG1	Schistosoma japonicum (Blood fluke)
	35	C1LFE0	Schistosoma japonicum (Blood fluke)
	36	O01372	Schistosoma japonicum (Blood fluke)
	37	Q5DH25	Schistosoma japonicum (Blood fluke)
	38	C7TY25	Schistosoma japonicum (Blood fluke)
	39	Q5DCQ8	Schistosoma japonicum (Blood fluke)
	40	Q86DV1	Schistosoma japonicum (Blood fluke)
	41	Q5DB55	Schistosoma japonicum (Blood fluke)
	42	O44372	Schistosoma japonicum (Blood fluke)
	43	Q86EI5	Schistosoma japonicum (Blood fluke)
	44	B3GV00	Schistosoma japonicum (Blood fluke)
	45	O45206	Schistosoma japonicum (Blood fluke)
	46	C1L9Q8	Schistosoma japonicum (Blood fluke)
	47	Q5DA51	Schistosoma japonicum (Blood fluke)
	48	Q5D8J1	Schistosoma japonicum (Blood fluke)
	49	Q5DG25	Schistosoma japonicum (Blood fluke)
	50	Q5D9P3	Schistosoma japonicum (Blood fluke)
	51	Q5DA21	Schistosoma japonicum (Blood fluke)
	52	Q5DDI6	Schistosoma japonicum (Blood fluke)
	53	Q7Z1I2	Schistosoma japonicum (Blood fluke)
	54	A8Q0F1	Brugia malayi (Filarial nematode worm)
	55	A8Q650	Brugia malayi (Filarial nematode worm)
	56	P91804	Schistosoma mansoni (Blood fluke)
	57	G4VRC7	Schistosoma mansoni (Blood fluke)
	58	C7DRP1	Onchocerca volvulus
	59	G4VTN2	Schistosoma mansoni (Blood fluke)
	60	G4VR24	Schistosoma mansoni (Blood fluke)
	61	Q26572	Schistosoma mansoni (Blood fluke)
	62	F1LDU1	Ascaris suum (Pig roundworm) (Ascaris lumbricoides)
	63	F1L651	Ascaris suum (Pig roundworm) (Ascaris lumbricoides)
	64	F1LEX0	Ascaris suum (Pig roundworm) (Ascaris lumbricoides)
	65	F1LEL5	Ascaris suum (Pig roundworm) (Ascaris lumbricoides)
	66	F1KPF8	Ascaris suum (Pig roundworm) (Ascaris lumbricoides)
	67	F1LF87	Ascaris suum (Pig roundworm) (Ascaris lumbricoides)
	68	F1LEH3	Ascaris suum (Pig roundworm) (Ascaris lumbricoides)
	69	F1KRN3	Ascaris suum (Pig roundworm) (Ascaris lumbricoides)
	70	F1KR43	Ascaris suum (Pig roundworm) (Ascaris lumbricoides)
	71	F1LHR2	Ascaris suum (Pig roundworm) (Ascaris lumbricoides)
	72	F1LD55	Ascaris suum (Pig roundworm) (Ascaris lumbricoides)
	73	F1LB35	Ascaris suum (Pig roundworm) (Ascaris lumbricoides)
	74	F1KRH3	Ascaris suum (Pig roundworm) (Ascaris lumbricoides)
	75	F1KU44	Ascaris suum (Pig roundworm) (Ascaris lumbricoides)
	76	F1LFS6	Ascaris suum (Pig roundworm) (Ascaris lumbricoides)
	77	F1KYA0	Ascaris suum (Pig roundworm) (Ascaris lumbricoides)
	78	F1L122	Ascaris suum (Pig roundworm) (Ascaris lumbricoides)
	79	F1KVF7	Ascaris suum (Pig roundworm) (Ascaris lumbricoides)
	80	F1LFN9	Ascaris suum (Pig roundworm) (Ascaris lumbricoides)
	81	F1LDU2	Ascaris suum (Pig roundworm) (Ascaris lumbricoides)
	82	F1L498	Ascaris suum (Pig roundworm) (Ascaris lumbricoides)
	83	F1LID1	Ascaris suum (Pig roundworm) (Ascaris lumbricoides)
	84	F1KTJ1	Ascaris suum (Pig roundworm) (Ascaris lumbricoides)
	85	F1LC56	Ascaris suum (Pig roundworm) (Ascaris lumbricoides)
	86	F1L358	Ascaris suum (Pig roundworm) (Ascaris lumbricoides)
	87	F1LGR7	Ascaris suum (Pig roundworm) (Ascaris lumbricoides)
	88	F1KYE1	Ascaris suum (Pig roundworm) (Ascaris lumbricoides)
	89	F1LI54	Ascaris suum (Pig roundworm) (Ascaris lumbricoides)
	90	F1LFW9	Ascaris suum (Pig roundworm) (Ascaris lumbricoides)
	91	F1L911	Ascaris suum (Pig roundworm) (Ascaris lumbricoides)
	92	F1KPR0	Ascaris suum (Pig roundworm) (Ascaris lumbricoides)
	93	F1LD57	Ascaris suum (Pig roundworm) (Ascaris lumbricoides)
	94	F1L6L1	Ascaris suum (Pig roundworm) (Ascaris lumbricoides)
	95	F1L8T4	Ascaris suum (Pig roundworm) (Ascaris lumbricoides)
	96	F1LHR0	Ascaris suum (Pig roundworm) (Ascaris lumbricoides)
	97	F1KZT2	Ascaris suum (Pig roundworm) (Ascaris lumbricoides)
	98	F1L1C0	Ascaris suum (Pig roundworm) (Ascaris lumbricoides)
	99	F1L0Z4	Ascaris suum (Pig roundworm) (Ascaris lumbricoides)
	100	F1LF35	Ascaris suum (Pig roundworm) (Ascaris lumbricoides)
	101	F1KVV5	Ascaris suum (Pig roundworm) (Ascaris lumbricoides)
	102	F1KZE7	Ascaris suum (Pig roundworm) (Ascaris lumbricoides)
	103	F1LH11	Ascaris suum (Pig roundworm) (Ascaris lumbricoides)
	104	F1LHF6	Ascaris suum (Pig roundworm) (Ascaris lumbricoides)
	105	E5SEJ5	Trichinella spiralis (Trichina worm)
	106	E5S523	Trichinella spiralis (Trichina worm)
	107	E5SWS5	Trichinella spiralis (Trichina worm)
	108	E5S3Y6	Trichinella spiralis (Trichina worm)
	109	E5SD35	Trichinella spiralis (Trichina worm)
	110	E5S0U8	Trichinella spiralis (Trichina worm)
	111	E5SJV7	Trichinella spiralis (Trichina worm)
	112	E5SKN2	Trichinella spiralis (Trichina worm)
	113	E5SP43	Trichinella spiralis (Trichina worm)
	114	E5SMT8	Trichinella spiralis (Trichina worm)
	115	E5SH50	Trichinella spiralis (Trichina worm)
	116	E5SRQ0	Trichinella spiralis (Trichina worm)
	117	E5S9M2	Trichinella spiralis (Trichina worm)
	118	E5SGE8	Trichinella spiralis (Trichina worm)
	119	E5SBL1	Trichinella spiralis (Trichina worm)
	120	E5S9U3	Trichinella spiralis (Trichina worm)
	121	E5S8G9	Trichinella spiralis (Trichina worm)
	122	E5ST86	Trichinella spiralis (Trichina worm)
	123	E5S4L1	Trichinella spiralis (Trichina worm)
	124	Q9BJM0	Trichinella spiralis (Trichina worm)
	125	E5SLN1	Trichinella spiralis (Trichina worm)
	126	E5SY52	Trichinella spiralis (Trichina worm)
	127	E5T8N5	Trichinella spiralis (Trichina worm)
	128	E5SL94	Trichinella spiralis (Trichina worm)
	129	E5SRF6	Trichinella spiralis (Trichina worm)
	130	E5SH47	Trichinella spiralis (Trichina worm)
	131	E5SQ18	Trichinella spiralis (Trichina worm)
	132	E5T161	Trichinella spiralis (Trichina worm)
	133	E5SBL4	Trichinella spiralis (Trichina worm)
	134	E5SQF0	Trichinella spiralis (Trichina worm)
	135	E5SAQ7	Trichinella spiralis (Trichina worm)
	136	E5SLM3	Trichinella spiralis (Trichina worm)
	137	E5SLB4	Trichinella spiralis (Trichina worm)
	138	E5S206	Trichinella spiralis (Trichina worm)
	139	E5S8B7	Trichinella spiralis (Trichina worm)
	140	E5S5Y9	Trichinella spiralis (Trichina worm)
	141	E5S309	Trichinella spiralis (Trichina worm)
	142	E5S4L6	Trichinella spiralis (Trichina worm)
	143	E5S2R4	Trichinella spiralis (Trichina worm)
	144	E5SMY7	Trichinella spiralis (Trichina worm)
	145	E5SQC4	Trichinella spiralis (Trichina worm)
	146	E5T152	Trichinella spiralis (Trichina worm)
	147	D5MRS9	Hydatigena taeniaeformis (Feline tapeworm) (Taenia taeniaeformis)
	148	L7UZ85	Dermatophagoides farinae (American house dust mite)
	149	Q7M469	Taenia crassiceps
	150	Q9NIG5	Fasciola hepatica (Liver fluke)
	151	O46120	Fasciola hepatica (Liver fluke)
	152	D0VAX0	Fasciola hepatica (Liver fluke)
	153	I6U578	Fasciola hepatica (Liver fluke)
	154	K7WKP9	Fasciola hepatica (Liver fluke)
	155	A4V9Q6	Fasciola hepatica (Liver fluke)
	156	L7ZE35	Echinococcus granulosus (Hydatid tapeworm)
	157	I6T381	Fasciola hepatica (Liver fluke)
	158	O46121	Fasciola hepatica (Liver fluke)
	159	A8Q8M4	Brugia malayi (Filarial nematode worm)
	160	A8P5F0	Brugia malayi (Filarial nematode worm)
	161	A8PUR5	Brugia malayi (Filarial nematode worm)
	162	A8Q1H1	Brugia malayi (Filarial nematode worm)
	163	A8PM62	Brugia malayi (Filarial nematode worm)
	164	A8Q7A9	Brugia malayi (Filarial nematode worm)
	165	A8PJH9	Brugia malayi (Filarial nematode worm)
	166	A8Q1R9	Brugia malayi (Filarial nematode worm)
	167	A8NPP6	Brugia malayi (Filarial nematode worm)
	168	A8P671	Brugia malayi (Filarial nematode worm)
	169	A8PJM4	Brugia malayi (Filarial nematode worm)
	170	A8Q5N8	Brugia malayi (Filarial nematode worm)
	171	A8NXH1	Brugia malayi (Filarial nematode worm)
	172	A8NYY7	Brugia malayi (Filarial nematode worm)
	173	A8QBK4	Brugia malayi (Filarial nematode worm)
	174	A8QGG8	Brugia malayi (Filarial nematode worm)
	175	A8QBU0	Brugia malayi (Filarial nematode worm)
	176	A8PQT6	Brugia malayi (Filarial nematode worm)
	177	A8QHG0	Brugia malayi (Filarial nematode worm)
	178	A8P593	Brugia malayi (Filarial nematode worm)
	179	A8QF16	Brugia malayi (Filarial nematode worm)
	180	A8QGN1	Brugia malayi (Filarial nematode worm)
	181	A8NNU5	Brugia malayi (Filarial nematode worm)
	182	A8QE84	Brugia malayi (Filarial nematode worm)
	183	A8PT73	Brugia malayi (Filarial nematode worm)
	184	A8NI56	Brugia malayi (Filarial nematode worm)
	185	A8PB51	Brugia malayi (Filarial nematode worm)
	186	A8PYV7	Brugia malayi (Filarial nematode worm)
	187	A8P5Y5	Brugia malayi (Filarial nematode worm)
	188	A8PIA7	Brugia malayi (Filarial nematode worm)
	189	A8PW93	Brugia malayi (Filarial nematode worm)
	190	A8PZS6	Brugia malayi (Filarial nematode worm)
	191	A8PIE3	Brugia malayi (Filarial nematode worm)
	192	A8Q3R5	Brugia malayi (Filarial nematode worm)
	193	Q5BT96	Schistosoma japonicum (Blood fluke)
	194	Q5DEU2	Schistosoma japonicum (Blood fluke)
	195	C1LES1	Schistosoma japonicum (Blood fluke)
	196	Q5BRG2	Schistosoma japonicum (Blood fluke)
	197	Q5C3I8	Schistosoma japonicum (Blood fluke)
	198	C1LYM5	Schistosoma japonicum (Blood fluke)
	199	Q5DFN5	Schistosoma japonicum (Blood fluke)
	200	C1LED2	Schistosoma japonicum (Blood fluke)
	201	Q5BQW4	Schistosoma japonicum (Blood fluke)
	202	C1LNV3	Schistosoma japonicum (Blood fluke)
	203	Q86F09	Schistosoma japonicum (Blood fluke)
	204	Q86RB3	Schistosoma japonicum (Blood fluke)
	205	Q5DBX4	Schistosoma japonicum (Blood fluke)
	206	Q5DBZ3	Schistosoma japonicum (Blood fluke)
	207	Q5DGX8	Schistosoma japonicum (Blood fluke)
	208	Q5DGX0	Schistosoma japonicum (Blood fluke)
	209	Q5DFV5	Schistosoma japonicum (Blood fluke)
	210	C1L4W3	Schistosoma japonicum (Blood fluke)
	211	C1LGJ0	Schistosoma japonicum (Blood fluke)
	212	C1LGC2	Schistosoma japonicum (Blood fluke)
	213	C1L468	Schistosoma japonicum (Blood fluke)
	214	Q03528	Schistosoma japonicum (Blood fluke)
	215	Q5DDD1	Schistosoma japonicum (Blood fluke)
	216	Q5DAR4	Schistosoma japonicum (Blood fluke)
	217	Q5DI10	Schistosoma japonicum (Blood fluke)
	218	C1LK95	Schistosoma japonicum (Blood fluke)
	219	Q3KZ56	Schistosoma japonicum (Blood fluke)
	220	Q5BZN5	Schistosoma japonicum (Blood fluke)
	221	Q5D909	Schistosoma japonicum (Blood fluke)
	222	C7TYD4	Schistosoma japonicum (Blood fluke)
	223	C1LNV0	Schistosoma japonicum (Blood fluke)
	224	Q86EE1	Schistosoma japonicum (Blood fluke)
	225	Q5D8Q5	Schistosoma japonicum (Blood fluke)
	226	C1LFG3	Schistosoma japonicum (Blood fluke)
	227	Q5C1W3	Schistosoma japonicum (Blood fluke)
	228	C1LDD5	Schistosoma japonicum (Blood fluke)
	229	Q5BVH9	Schistosoma japonicum (Blood fluke)
	230	Q5DDP6	Schistosoma japonicum (Blood fluke)
	231	Q5BSD7	Schistosoma japonicum (Blood fluke)
	232	Q5DBJ8	Schistosoma japonicum (Blood fluke)
	233	C1LGI9	Schistosoma japonicum (Blood fluke)
	234	C1L3Y8	Schistosoma japonicum (Blood fluke)
	235	C1L9T3	Schistosoma japonicum (Blood fluke)
	236	C1LIN5	Schistosoma japonicum (Blood fluke)
	237	Q5DGZ4	Schistosoma japonicum (Blood fluke)
	238	C1LJQ1	Schistosoma japonicum (Blood fluke)
	239	C1L9R5	Schistosoma japonicum (Blood fluke)
	240	Q5C2C3	Schistosoma japonicum (Blood fluke)
	241	Q5C262	Schistosoma japonicum (Blood fluke)
	242	Q5DES8	Schistosoma japonicum (Blood fluke)
	243	Q5C291	Schistosoma japonicum (Blood fluke)
	244	Q5DDR9	Schistosoma japonicum (Blood fluke)
	245	Q5C3R6	Schistosoma japonicum (Blood fluke)
	246	B3GUX8	Schistosoma japonicum (Blood fluke)
	247	C1LF28	Schistosoma japonicum (Blood fluke)
	248	Q5DGE2	Schistosoma japonicum (Blood fluke)
	249	C1L451	Schistosoma japonicum (Blood fluke)
	250	C1L9U2	Schistosoma japonicum (Blood fluke)
	251	C1LEL5	Schistosoma japonicum (Blood fluke)
	252	Q5BXK7	Schistosoma japonicum (Blood fluke)
	253	C1L626	Schistosoma japonicum (Blood fluke)
	254	C1L4Y9	Schistosoma japonicum (Blood fluke)
	255	Q26511	Schistosoma japonicum (Blood fluke)
	256	C1L9T7	Schistosoma japonicum (Blood fluke)
	257	C1LEP0	Schistosoma japonicum (Blood fluke)
	258	C1L8B8	Schistosoma japonicum (Blood fluke)
	259	Q86H16	Schistosoma japonicum (Blood fluke)
	260	Q5BXR1	Schistosoma japonicum (Blood fluke)
	261	C1LKZ9	Schistosoma japonicum (Blood fluke)
	262	Q5DC34	Schistosoma japonicum (Blood fluke)
	263	C1LF97	Schistosoma japonicum (Blood fluke)
	264	Q5C7B7	Schistosoma japonicum (Blood fluke)
	265	Q5D918	Schistosoma japonicum (Blood fluke)
	266	C1L7W4	Schistosoma japonicum (Blood fluke)
	267	C1LEZ4	Schistosoma japonicum (Blood fluke)
	268	C1LE06	Schistosoma japonicum (Blood fluke)
	269	Q9U3U5	Anisakis simplex (Herring worm)
	270	Q9NJD9	Onchocerca volvulus
	271	A3F4U5	Taenia asiatica (Asian tapeworm)
	272	A3F4Y2	Taenia asiatica (Asian tapeworm)
	273	A3F4V0	Taenia asiatica (Asian tapeworm)
	274	A3F4Y4	Taenia asiatica (Asian tapeworm)
	275	D2DGW3	Tyrophagus putrescentiae (Dust mite)
	276	Q5I5L5	Schistosoma haematobium (Blood fluke)
	277	A5A6F7	Schistosoma haematobium (Blood fluke)
	278	A5A6F6	Schistosoma haematobium (Blood fluke)
	279	G4VEN2	Schistosoma mansoni (Blood fluke)
	280	G4VHD3	Schistosoma mansoni (Blood fluke)
	281	G4VSS5	Schistosoma mansoni (Blood fluke)
	282	C4Q2F2	Schistosoma mansoni (Blood fluke)
	283	G4VR87	Schistosoma mansoni (Blood fluke)
	284	G4VR56	Schistosoma mansoni (Blood fluke)
	285	G4VR57	Schistosoma mansoni (Blood fluke)
	286	G4VT56	Schistosoma mansoni (Blood fluke)
	287	G4V6T9	Schistosoma mansoni (Blood fluke)
	288	G4VRV0	Schistosoma mansoni (Blood fluke)
	289	C4Q2F3	Schistosoma mansoni (Blood fluke)
	290	G4LVT6	Schistosoma mansoni (Blood fluke)
	291	G4LZZ3	Schistosoma mansoni (Blood fluke)
	292	G4VQR1	Schistosoma mansoni (Blood fluke)
	293	G4VK91	Schistosoma mansoni (Blood fluke)
	294	G4VM03	Schistosoma mansoni (Blood fluke)
	295	G4VPD9	Schistosoma mansoni (Blood fluke)
	296	G4LWX2	Schistosoma mansoni (Blood fluke)
	297	G4VDT6	Schistosoma mansoni (Blood fluke)
	298	G4VT44	Schistosoma mansoni (Blood fluke)
	299	G4VFT8	Schistosoma mansoni (Blood fluke)
	300	G4VR86	Schistosoma mansoni (Blood fluke)
	301	G4VPT6	Schistosoma mansoni (Blood fluke)
	302	G4V611	Schistosoma mansoni (Blood fluke)
	303	G4VPE1	Schistosoma mansoni (Blood fluke)
	304	G4VBW4	Schistosoma mansoni (Blood fluke)
	305	G4VDT5	Schistosoma mansoni (Blood fluke)
	306	G4VAG2	Schistosoma mansoni (Blood fluke)
	307	G4VPR2	Schistosoma mansoni (Blood fluke)
	308	G4LXE8	Schistosoma mansoni (Blood fluke)
	309	I4EC26	Schistosoma mansoni (Blood fluke)
	310	G4LZ72	Schistosoma mansoni (Blood fluke)
	311	G4VG24	Schistosoma mansoni (Blood fluke)
	312	G4VJ04	Schistosoma mansoni (Blood fluke)
	313	G4LZ30	Schistosoma mansoni (Blood fluke)
	314	G4VEN7	Schistosoma mansoni (Blood fluke)
	315	G4V5N3	Schistosoma mansoni (Blood fluke)
	316	G4VBC1	Schistosoma mansoni (Blood fluke)
	317	G4LZ75	Schistosoma mansoni (Blood fluke)
	318	G4VR91	Schistosoma mansoni (Blood fluke)
	319	G4LUD9	Schistosoma mansoni (Blood fluke)
	320	G4VR89	Schistosoma mansoni (Blood fluke)
	321	G4V610	Schistosoma mansoni (Blood fluke)
	322	G4VCK1	Schistosoma mansoni (Blood fluke)
	323	G4VEE4	Schistosoma mansoni (Blood fluke)
	324	G4VRV1	Schistosoma mansoni (Blood fluke)
	325	G4VR84	Schistosoma mansoni (Blood fluke)
	326	G4LZZ2	Schistosoma mansoni (Blood fluke)
	327	G4VHD4	Schistosoma mansoni (Blood fluke)
	328	G4V609	Schistosoma mansoni (Blood fluke)
	329	G4VPE0	Schistosoma mansoni (Blood fluke)
	330	G4VT45	Schistosoma mansoni (Blood fluke)
	331	G4LZ74	Schistosoma mansoni (Blood fluke)
	332	G4VBS3	Schistosoma mansoni (Blood fluke)
	333	G4LWY2	Schistosoma mansoni (Blood fluke)
	334	G4VJT7	Schistosoma mansoni (Blood fluke)
	335	G4VR58	Schistosoma mansoni (Blood fluke)
	336	G4VCW8	Schistosoma mansoni (Blood fluke)
	337	Q9NFN1	Schistosoma mansoni (Blood fluke)
	338	G4VPD8	Schistosoma mansoni (Blood fluke)
	339	G4M1S7	Schistosoma mansoni (Blood fluke)
	340	G4LW29	Schistosoma mansoni (Blood fluke)
	341	G4VA29	Schistosoma mansoni (Blood fluke)
	342	C4QKY6	Schistosoma mansoni (Blood fluke)
	343	G4M0U4	Schistosoma mansoni (Blood fluke)
	344	E9LZR8	Schistosoma mansoni (Blood fluke)
	345	G4VP59	Schistosoma mansoni (Blood fluke)
	346	G4V7S7	Schistosoma mansoni (Blood fluke)
	347	Q94751	Schistosoma mansoni (Blood fluke)
	348	G4VMN9	Schistosoma mansoni (Blood fluke)
	349	G4VLW6	Schistosoma mansoni (Blood fluke)
	350	C4Q5J4	Schistosoma mansoni (Blood fluke)
	351	G4VN18	Schistosoma mansoni (Blood fluke)
	352	I4EC24	Schistosoma mansoni (Blood fluke)
	353	G4V737	Schistosoma mansoni (Blood fluke)
	354	Q9Y1U7	Schistosoma mansoni (Blood fluke)
	355	G4VM55	Schistosoma mansoni (Blood fluke)
	356	G4VR90	Schistosoma mansoni (Blood fluke)
	357	G4VKW2	Schistosoma mansoni (Blood fluke)
	358	G4VPD7	Schistosoma mansoni (Blood fluke)
	359	G4VAV1	Schistosoma mansoni (Blood fluke)
	360	G4VR88	Schistosoma mansoni (Blood fluke)
	361	E6Y8P8	Taenia multiceps (Coenurus tapeworm) (Multiceps multiceps)
	362	Q9NI46	Taenia solium (Pork tapeworm)

## Sheet: Sheet2
	Sr. No.	Uniprot accession code, Homolgues of allergenic protein (CAP) in parasites	Organism
	1	F1LD82	Ascaris suum (Pig roundworm) (Ascaris lumbricoides)
	2	C1LUP8	Schistosoma japonicum (Blood fluke)
	3	C1LP42	Schistosoma japonicum (Blood fluke)
	4	C1LUR6	Schistosoma japonicum (Blood fluke)
	5	C1LUS0	Schistosoma japonicum (Blood fluke)
	6	C1LUR0	Schistosoma japonicum (Blood fluke)
	7	C1LNA0	Schistosoma japonicum (Blood fluke)
	8	C1LUQ1	Schistosoma japonicum (Blood fluke)
	9	C1LN94	Schistosoma japonicum (Blood fluke)
	10	C1LN98	Schistosoma japonicum (Blood fluke)
	11	B3GUV1	Schistosoma japonicum (Blood fluke)
	12	Q1WMM8	Schistosoma mansoni (Blood fluke)
	13	Q9GPN4	Onchocerca volvulus
	14	G4VMD1	Schistosoma mansoni (Blood fluke)
	15	Q1WIQ3	Schistosoma mansoni (Blood fluke)
	16	Q1X6L4	Schistosoma mansoni (Blood fluke)
	17	Q1X6L5	Schistosoma mansoni (Blood fluke)
	18	Q1WIQ4	Schistosoma mansoni (Blood fluke)
	19	F1L974	Ascaris suum (Pig roundworm) (Ascaris lumbricoides)
	20	F1LI26	Ascaris suum (Pig roundworm) (Ascaris lumbricoides)
	21	F1L8V1	Ascaris suum (Pig roundworm) (Ascaris lumbricoides)
	22	F1LBL2	Ascaris suum (Pig roundworm) (Ascaris lumbricoides)
	23	F1LBB0	Ascaris suum (Pig roundworm) (Ascaris lumbricoides)
	24	F1LDH6	Ascaris suum (Pig roundworm) (Ascaris lumbricoides)
	25	F1L9M7	Ascaris suum (Pig roundworm) (Ascaris lumbricoides)
	26	F1L499	Ascaris suum (Pig roundworm) (Ascaris lumbricoides)
	27	F1L5E5	Ascaris suum (Pig roundworm) (Ascaris lumbricoides)
	28	E5S5T1	Trichinella spiralis (Trichina worm)
	29	E5S848	Trichinella spiralis (Trichina worm)
	30	E5SUQ0	Trichinella spiralis (Trichina worm)
	31	E5S7U5	Trichinella spiralis (Trichina worm)
	32	E5SGP8	Trichinella spiralis (Trichina worm)
	33	E5SUQ2	Trichinella spiralis (Trichina worm)
	34	E5SG97	Trichinella spiralis (Trichina worm)
	35	E5SFE6	Trichinella spiralis (Trichina worm)
	36	E5SVR8	Trichinella spiralis (Trichina worm)
	37	E5S2M1	Trichinella spiralis (Trichina worm)
	38	E5SCM9	Trichinella spiralis (Trichina worm)
	39	E5SXV3	Trichinella spiralis (Trichina worm)
	40	E5T0X8	Trichinella spiralis (Trichina worm)
	41	E5S249	Trichinella spiralis (Trichina worm)
	42	A8P7Q2	Brugia malayi (Filarial nematode worm)
	43	A8P1B4	Brugia malayi (Filarial nematode worm)
	44	A8QEE2	Brugia malayi (Filarial nematode worm)
	45	A8Q123	Brugia malayi (Filarial nematode worm)
	46	A8PTT0	Brugia malayi (Filarial nematode worm)
	47	A8P1B1	Brugia malayi (Filarial nematode worm)
	48	A8P1B2	Brugia malayi (Filarial nematode worm)
	49	Q5DHX7	Schistosoma japonicum (Blood fluke)
	50	Q86F86	Schistosoma japonicum (Blood fluke)
	51	C1LUQ0	Schistosoma japonicum (Blood fluke)
	52	C1LUR8	Schistosoma japonicum (Blood fluke)
	53	C1LFL0	Schistosoma japonicum (Blood fluke)
	54	C1LUP9	Schistosoma japonicum (Blood fluke)
	55	C1LUP7	Schistosoma japonicum (Blood fluke)
	56	Q5C046	Schistosoma japonicum (Blood fluke)
	57	C1LUQ2	Schistosoma japonicum (Blood fluke)
	58	C1LUP6	Schistosoma japonicum (Blood fluke)
	59	C1LUR5	Schistosoma japonicum (Blood fluke)
	60	Q5DFA7	Schistosoma japonicum (Blood fluke)
	61	Q5DG09	Schistosoma japonicum (Blood fluke)
	62	C1LP37	Schistosoma japonicum (Blood fluke)
	63	C1LUQ5	Schistosoma japonicum (Blood fluke)
	64	C1LUQ3	Schistosoma japonicum (Blood fluke)
	65	C1LUQ7	Schistosoma japonicum (Blood fluke)
	66	C1LP44	Schistosoma japonicum (Blood fluke)
	67	Q5DEN9	Schistosoma japonicum (Blood fluke)
	68	Q5DI27	Schistosoma japonicum (Blood fluke)
	69	C1LHZ3	Schistosoma japonicum (Blood fluke)
	70	C1LN95	Schistosoma japonicum (Blood fluke)
	71	C1LF38	Schistosoma japonicum (Blood fluke)
	72	C1LE34	Schistosoma japonicum (Blood fluke)
	73	C1LN99	Schistosoma japonicum (Blood fluke)
	74	Q5DGP9	Schistosoma japonicum (Blood fluke)
	75	Q5BYM7	Schistosoma japonicum (Blood fluke)
	76	Q86EZ0	Schistosoma japonicum (Blood fluke)
	77	Q5DA03	Schistosoma japonicum (Blood fluke)
	78	O16854	Onchocerca volvulus
	79	Q86FX1	Onchocerca volvulus
	80	O44931	Onchocerca volvulus
	81	B1NYH8	Schistosoma mansoni (Blood fluke)
	82	G4VM60	Schistosoma mansoni (Blood fluke)
	83	G4VMG1	Schistosoma mansoni (Blood fluke)
	84	Q1X6L6	Schistosoma mansoni (Blood fluke)
	85	G4V6N2	Schistosoma mansoni (Blood fluke)
	86	G4VMD2	Schistosoma mansoni (Blood fluke)
	87	G4VLG2	Schistosoma mansoni (Blood fluke)
	88	Q1WL54	Schistosoma mansoni (Blood fluke)
	89	G1EN92	Schistosoma mansoni (Blood fluke)
	90	G4VMG6	Schistosoma mansoni (Blood fluke)
	91	A3RK86	Schistosoma mansoni (Blood fluke)
	92	G4V6N3	Schistosoma mansoni (Blood fluke)
	93	G4VC56	Schistosoma mansoni (Blood fluke)
	94	G4V7L8	Schistosoma mansoni (Blood fluke)
	95	G4VL17	Schistosoma mansoni (Blood fluke)
	96	Q1WMM9	Schistosoma mansoni (Blood fluke)
	97	C1M129	Schistosoma mansoni (Blood fluke)
	98	Q1WIQ2	Schistosoma mansoni (Blood fluke)
	99	G4VMG2	Schistosoma mansoni (Blood fluke)
	100	Q1XAN2	Schistosoma mansoni (Blood fluke)
	101	G4V6N0	Schistosoma mansoni (Blood fluke)
	102	G4VMG5	Schistosoma mansoni (Blood fluke)
	103	G4VLG3	Schistosoma mansoni (Blood fluke)
	104	G4VC55	Schistosoma mansoni (Blood fluke)
	105	G4VM59	Schistosoma mansoni (Blood fluke)
	106	G4V6N1	Schistosoma mansoni (Blood fluke)
	107	G4LXW0	Schistosoma mansoni (Blood fluke)
	108	G4VME3	Schistosoma mansoni (Blood fluke)
	109	G4V6M9	Schistosoma mansoni (Blood fluke)
	110	Q1WIQ5	Schistosoma mansoni (Blood fluke)
	111	A3RK85	Schistosoma mansoni (Blood fluke)
	112	G4VMG0	Schistosoma mansoni (Blood fluke)
	113	G4VKZ1	Schistosoma mansoni (Blood fluke)

## Sheet: Sheet3
	Sr. No.	Uniprot accession code, Homolgues of allergenic protein (Tropomyosin) in parasites	Organism
	1	P42637	Schistosoma mansoni (Blood fluke)
	2	P42638	Schistosoma mansoni (Blood fluke)
	3	Q9NAS5	Anisakis simplex (Herring worm)
	4	O18416	Dermatophagoides pteronyssinus (European house dust mite)
	5	O16127	Echinococcus granulosus (Hydatid tapeworm)
	6	Q9NFZ4	Lepidoglyphus destructor (Fodder mite)
	7	Q25632	Onchocerca volvulus
	8	Q26519	Schistosoma japonicum (Blood fluke)
	9	Q26503	Schistosoma haematobium (Blood fluke)
	10	Q95VA8	Trichinella spiralis (Trichina worm)
	11	B0ZDV1	Echinococcus granulosus (Hydatid tapeworm)
	12	B0ZDV2	Echinococcus granulosus (Hydatid tapeworm)
	13	A1KYZ1	Aleuroglyphus ovatus (brown legged grain mite)
	14	B3W666	Schistosoma japonicum (Blood fluke)
	15	C1LKP1	Schistosoma japonicum (Blood fluke)
	16	C1LNS2	Schistosoma japonicum (Blood fluke)
	17	C7TZU6	Schistosoma japonicum (Blood fluke)
	18	Q8MUK6	Schistosoma japonicum (Blood fluke)
	19	G4VN65	Schistosoma mansoni (Blood fluke)
	20	G4VN76	Schistosoma mansoni (Blood fluke)
	21	G4VN78	Schistosoma mansoni (Blood fluke)
	22	F1LGQ8	Ascaris suum (Pig roundworm) (Ascaris lumbricoides)
	23	F1L218	Ascaris suum (Pig roundworm) (Ascaris lumbricoides)
	24	F1L3V2	Ascaris suum (Pig roundworm) (Ascaris lumbricoides)
	25	F1KVZ5	Ascaris suum (Pig roundworm) (Ascaris lumbricoides)
	26	F1LGR3	Ascaris suum (Pig roundworm) (Ascaris lumbricoides)
	27	F1LF63	Ascaris suum (Pig roundworm) (Ascaris lumbricoides)
	28	E5SUW4	Trichinella spiralis (Trichina worm)
	29	E5SUW5	Trichinella spiralis (Trichina worm)
	30	E5SUX7	Trichinella spiralis (Trichina worm)
	31	E5SUX9	Trichinella spiralis (Trichina worm)
	32	F0V424	Trichinella spiralis (Trichina worm)
	33	Q1M2L8	Glycyphagus domesticus (House itch mite)
	34	A7XZI8	Dermatophagoides farinae (American house dust mite)
	35	Q3BJY7	Psoroptes ovis (Sheep scab mite)
	36	B0KZJ4	Acarus siro (Flour mite) (Tyroglyphus farinae)
	37	C0L3K2	Ascaris lumbricoides (Giant roundworm)
	38	A8DKY0	Ascaris lumbricoides (Giant roundworm)
	39	E0W6F9	Echinococcus granulosus (Hydatid tapeworm)
	40	A8NGJ2	Brugia malayi (Filarial nematode worm)
	41	A8NF40	Brugia malayi (Filarial nematode worm)
	42	C1LDB4	Schistosoma japonicum (Blood fluke)
	43	C1L5H8	Schistosoma japonicum (Blood fluke)
	44	Q5DHD1	Schistosoma japonicum (Blood fluke)
	45	Q5DG15	Schistosoma japonicum (Blood fluke)
	46	C1LNS1	Schistosoma japonicum (Blood fluke)
	47	Q86DU9	Schistosoma japonicum (Blood fluke)
	48	C1L8K6	Schistosoma japonicum (Blood fluke)
	49	Q5DE53	Schistosoma japonicum (Blood fluke)
	50	C7TXT8	Schistosoma japonicum (Blood fluke)
	51	C1L8K8	Schistosoma japonicum (Blood fluke)
	52	Q5DAF7	Schistosoma japonicum (Blood fluke)
	53	Q5C3B9	Schistosoma japonicum (Blood fluke)
	54	Q5C3B4	Schistosoma japonicum (Blood fluke)
	55	Q5DHF2	Schistosoma japonicum (Blood fluke)
	56	C1L5H9	Schistosoma japonicum (Blood fluke)
	57	K7P6E6	Sarcoptes scabiei (Itch mite) (Acarus scabiei)
	58	B6E457	Dermatophagoides pteronyssinus (European house dust mite)
	59	Q304Y3	Dermatophagoides pteronyssinus (European house dust mite)
	60	A7XZI4	Blomia tropicalis (Mite)
	61	G4XTD3	Anisakis simplex (Herring worm)
	62	A3F4W9	Taenia asiatica (Asian tapeworm)
	63	Q1EHG7	Aleuroglyphus ovatus (brown legged grain mite)
	64	A5YWA8	Tyrophagus putrescentiae (Dust mite)
	65	A7XZL2	Tyrophagus putrescentiae (Dust mite)
	66	Q6IUP9	Tyrophagus putrescentiae (Dust mite)
	67	G4VN73	Schistosoma mansoni (Blood fluke)
	68	G4VD37	Schistosoma mansoni (Blood fluke)
	69	G4VN69	Schistosoma mansoni (Blood fluke)
	70	G4M1N6	Schistosoma mansoni (Blood fluke)
	71	G4LV43	Schistosoma mansoni (Blood fluke)
	72	G4VN75	Schistosoma mansoni (Blood fluke)
	73	G4VN70	Schistosoma mansoni (Blood fluke)
	74	G4LV44	Schistosoma mansoni (Blood fluke)
	75	G4LV45	Schistosoma mansoni (Blood fluke)
	76	G4VN68	Schistosoma mansoni (Blood fluke)
	77	G4VN77	Schistosoma mansoni (Blood fluke)
	78	G4VN72	Schistosoma mansoni (Blood fluke)
	79	G4VN71	Schistosoma mansoni (Blood fluke)
	80	G4VN67	Schistosoma mansoni (Blood fluke)
	81	G4VN66	Schistosoma mansoni (Blood fluke)

## Sheet: Sheet4
	Sr. No.	Uniprot accession code, Homolgues of allergenic protein (Profilin) in parasites	Organism
	1	Q86DW4	Schistosoma japonicum (Blood fluke)
	2	F1LBX8	Ascaris suum (Pig roundworm) (Ascaris lumbricoides)
	3	F1LGV9	Ascaris suum (Pig roundworm) (Ascaris lumbricoides)
	4	E5S6E2	Trichinella spiralis (Trichina worm)
	5	E5T0G3	Trichinella spiralis (Trichina worm)
	6	A8PC30	Brugia malayi (Filarial nematode worm)
	7	B2ZRT3	Brugia malayi (Filarial nematode worm)
	8	C1LTM1	Schistosoma japonicum (Blood fluke)
	9	C1LTM3	Schistosoma japonicum (Blood fluke)
	10	A1KXJ2	Blomia tropicalis (Mite)
	11	G4VTE2	Schistosoma mansoni (Blood fluke)
	12	G4VTE1	Schistosoma mansoni (Blood fluke)
	13	G4VTE3	Schistosoma mansoni (Blood fluke)

## Sheet: Sheet5
	Sr. No.	Uniprot accession code, Homolgues of allergenic protein (Lipocalin) in parasites	Organism
	1	Q02970	Echinococcus granulosus (Hydatid tapeworm)
	2	Q7M4G0	Fasciola hepatica (Liver fluke)
	3	Q9BMK3	Echinococcus granulosus (Hydatid tapeworm)
	4	Q7M4G1	Fasciola hepatica (Liver fluke)
	5	Q9U1G6	Fasciola hepatica (Liver fluke)
	6	Q17284	Blomia tropicalis (Mite)
	7	Q9U5P1	Lepidoglyphus destructor (Fodder mite)
	8	O45035	Schistosoma japonicum (Blood fluke)
	9	P29498	Schistosoma mansoni (Blood fluke)
	10	Q2XNL7	Taenia solium (Pork tapeworm)
	11	C1L9W1	Schistosoma japonicum (Blood fluke)
	12	B5B7Q8	Schistosoma japonicum (Blood fluke)
	13	Q5DBB2	Schistosoma japonicum (Blood fluke)
	14	A8QF29	Brugia malayi (Filarial nematode worm)
	15	F1LGJ5	Ascaris suum (Pig roundworm) (Ascaris lumbricoides)
	16	F1L3L5	Ascaris suum (Pig roundworm) (Ascaris lumbricoides)
	17	F1LH25	Ascaris suum (Pig roundworm) (Ascaris lumbricoides)
	18	E5S1W4	Trichinella spiralis (Trichina worm)
	19	Q1M2M3	Glycyphagus domesticus (House itch mite)
	20	A1KXH1	Dermatophagoides farinae (American house dust mite)
	21	Q1M2P5	Dermatophagoides farinae (American house dust mite)
	22	B0KZJ5	Acarus siro (Flour mite) (Tyroglyphus farinae)
	23	B0KZJ6	Acarus siro (Flour mite) (Tyroglyphus farinae)
	24	Q5Q030	Echinococcus granulosus (Hydatid tapeworm)
	25	C1L9W3	Schistosoma japonicum (Blood fluke)
	26	C1LRF9	Schistosoma japonicum (Blood fluke)
	27	C1L9V6	Schistosoma japonicum (Blood fluke)
	28	C1L9W2	Schistosoma japonicum (Blood fluke)
	29	A1KXH5	Blomia tropicalis (Mite)
	30	E0A8N8	Dermatophagoides pteronyssinus (European house dust mite)
	31	A1KXG8	Blomia tropicalis (Mite)
	32	A1KXG9	Blomia tropicalis (Mite)
	33	J9PE36	Taenia pisiformis (Tapeworm) (Cysticercus pisiformis)
	34	B0KZK6	Aleuroglyphus ovatus (brown legged grain mite)
	35	B0KZK2	Aleuroglyphus ovatus (brown legged grain mite)
	36	B0KZL2	Tyrophagus putrescentiae (Dust mite)
	37	B0KZL3	Tyrophagus putrescentiae (Dust mite)
	38	Q66RP5	Tyrophagus putrescentiae (Dust mite)
	39	A7XZL4	Tyrophagus putrescentiae (Dust mite)
	40	A5A6F5	Schistosoma haematobium (Blood fluke)
	41	G4M130	Schistosoma mansoni (Blood fluke)
	42	K0A0S9	Taenia solium (Pork tapeworm)

## Sheet: Sheet6
	Sr. No.	Uniprot accession code, Homolgues of allergenic protein (Trypsin-like serine protease) in parasites	Organism
	1	P12546	Schistosoma mansoni (Blood fluke)
	2	P49275	Dermatophagoides farinae (American house dust mite)
	3	P49276	Dermatophagoides farinae (American house dust mite)
	4	P39675	Dermatophagoides pteronyssinus (European house dust mite)
	5	O97370	Euroglyphus maynei (Mayne's house dust mite)
	6	I1WXU1	Echinococcus granulosus (Hydatid tapeworm)
	7	F1L2Y6	Ascaris suum (Pig roundworm) (Ascaris lumbricoides)
	8	A1KXH3	Dermatophagoides farinae (American house dust mite)
	9	A9YYL0	Dermatophagoides farinae (American house dust mite)
	10	C1LGJ8	Schistosoma japonicum (Blood fluke)
	11	U3RBT1	Schistosoma japonicum (Blood fluke)
	12	A8NQ07	Brugia malayi (Filarial nematode worm)
	13	Q8MUV7	Schistosoma mansoni (Blood fluke)
	14	G4M1A6	Schistosoma mansoni (Blood fluke)
	15	F1KQ91	Ascaris suum (Pig roundworm) (Ascaris lumbricoides)
	16	F1KSP3	Ascaris suum (Pig roundworm) (Ascaris lumbricoides)
	17	F1L402	Ascaris suum (Pig roundworm) (Ascaris lumbricoides)
	18	F1L8G0	Ascaris suum (Pig roundworm) (Ascaris lumbricoides)
	19	F1L977	Ascaris suum (Pig roundworm) (Ascaris lumbricoides)
	20	F8UQX3	Ascaris suum (Pig roundworm) (Ascaris lumbricoides)
	21	F1L0B7	Ascaris suum (Pig roundworm) (Ascaris lumbricoides)
	22	F1L2I2	Ascaris suum (Pig roundworm) (Ascaris lumbricoides)
	23	F1KZF9	Ascaris suum (Pig roundworm) (Ascaris lumbricoides)
	24	F1LAQ3	Ascaris suum (Pig roundworm) (Ascaris lumbricoides)
	25	F1L5S8	Ascaris suum (Pig roundworm) (Ascaris lumbricoides)
	26	F1KQI4	Ascaris suum (Pig roundworm) (Ascaris lumbricoides)
	27	F1L689	Ascaris suum (Pig roundworm) (Ascaris lumbricoides)
	28	F1LAR3	Ascaris suum (Pig roundworm) (Ascaris lumbricoides)
	29	F1L7U1	Ascaris suum (Pig roundworm) (Ascaris lumbricoides)
	30	F1L4T8	Ascaris suum (Pig roundworm) (Ascaris lumbricoides)
	31	F1LH76	Ascaris suum (Pig roundworm) (Ascaris lumbricoides)
	32	F1LAT2	Ascaris suum (Pig roundworm) (Ascaris lumbricoides)
	33	F1KYN4	Ascaris suum (Pig roundworm) (Ascaris lumbricoides)
	34	F1KT21	Ascaris suum (Pig roundworm) (Ascaris lumbricoides)
	35	F1L9U8	Ascaris suum (Pig roundworm) (Ascaris lumbricoides)
	36	F1L8W0	Ascaris suum (Pig roundworm) (Ascaris lumbricoides)
	37	F1L3P0	Ascaris suum (Pig roundworm) (Ascaris lumbricoides)
	38	F1LB91	Ascaris suum (Pig roundworm) (Ascaris lumbricoides)
	39	E5S5A9	Trichinella spiralis (Trichina worm)
	40	Q9BIC9	Trichinella spiralis (Trichina worm)
	41	B0F9T8	Trichinella spiralis (Trichina worm)
	42	E5RYF9	Trichinella spiralis (Trichina worm)
	43	E5RYG3	Trichinella spiralis (Trichina worm)
	44	E5SC38	Trichinella spiralis (Trichina worm)
	45	E5S647	Trichinella spiralis (Trichina worm)
	46	E5S751	Trichinella spiralis (Trichina worm)
	47	E5SE62	Trichinella spiralis (Trichina worm)
	48	E5S3D4	Trichinella spiralis (Trichina worm)
	49	E5SUC2	Trichinella spiralis (Trichina worm)
	50	F0V423	Trichinella spiralis (Trichina worm)
	51	E5SGK7	Trichinella spiralis (Trichina worm)
	52	E5SMR2	Trichinella spiralis (Trichina worm)
	53	B0F9T9	Trichinella spiralis (Trichina worm)
	54	E5RYG4	Trichinella spiralis (Trichina worm)
	55	B0F9T6	Trichinella spiralis (Trichina worm)
	56	E5S5G4	Trichinella spiralis (Trichina worm)
	57	A1DYF0	Trichinella spiralis (Trichina worm)
	58	E5SIX4	Trichinella spiralis (Trichina worm)
	59	E5S329	Trichinella spiralis (Trichina worm)
	60	E5S4U1	Trichinella spiralis (Trichina worm)
	61	E5SHJ4	Trichinella spiralis (Trichina worm)
	62	E5SBE3	Trichinella spiralis (Trichina worm)
	63	E5SZG4	Trichinella spiralis (Trichina worm)
	64	E5SCH0	Trichinella spiralis (Trichina worm)
	65	E5SVN6	Trichinella spiralis (Trichina worm)
	66	E5S2F0	Trichinella spiralis (Trichina worm)
	67	E5S2W9	Trichinella spiralis (Trichina worm)
	68	E5S4U0	Trichinella spiralis (Trichina worm)
	69	E5SUQ1	Trichinella spiralis (Trichina worm)
	70	E5S9C1	Trichinella spiralis (Trichina worm)
	71	E5SBE6	Trichinella spiralis (Trichina worm)
	72	Q9BJL7	Trichinella spiralis (Trichina worm)
	73	B0F9T7	Trichinella spiralis (Trichina worm)
	74	B0F9T5	Trichinella spiralis (Trichina worm)
	75	E5SAA1	Trichinella spiralis (Trichina worm)
	76	E5SPK4	Trichinella spiralis (Trichina worm)
	77	E5RYV9	Trichinella spiralis (Trichina worm)
	78	E5S579	Trichinella spiralis (Trichina worm)
	79	E5SE11	Trichinella spiralis (Trichina worm)
	80	E5T206	Trichinella spiralis (Trichina worm)
	81	E5T4I0	Trichinella spiralis (Trichina worm)
	82	E5S4B5	Trichinella spiralis (Trichina worm)
	83	E5SV40	Trichinella spiralis (Trichina worm)
	84	E5S9B8	Trichinella spiralis (Trichina worm)
	85	E5SPK7	Trichinella spiralis (Trichina worm)
	86	F0V430	Trichinella spiralis (Trichina worm)
	87	E5S7T3	Trichinella spiralis (Trichina worm)
	88	E5SV39	Trichinella spiralis (Trichina worm)
	89	O96871	Trichinella spiralis (Trichina worm)
	90	E5S444	Trichinella spiralis (Trichina worm)
	91	E5SE60	Trichinella spiralis (Trichina worm)
	92	E5S9G8	Trichinella spiralis (Trichina worm)
	93	E5SAZ5	Trichinella spiralis (Trichina worm)
	94	E5SE70	Trichinella spiralis (Trichina worm)
	95	E5SNG7	Trichinella spiralis (Trichina worm)
	96	E5SCH5	Trichinella spiralis (Trichina worm)
	97	Q9BJM1	Trichinella spiralis (Trichina worm)
	98	E5SY89	Trichinella spiralis (Trichina worm)
	99	E5SAH0	Trichinella spiralis (Trichina worm)
	100	E5SUC3	Trichinella spiralis (Trichina worm)
	101	E5SE71	Trichinella spiralis (Trichina worm)
	102	E5SPA7	Trichinella spiralis (Trichina worm)
	103	E5S9P5	Trichinella spiralis (Trichina worm)
	104	B7SIW5	Trichinella spiralis (Trichina worm)
	105	E5S0I0	Trichinella spiralis (Trichina worm)
	106	E5SE14	Trichinella spiralis (Trichina worm)
	107	E5T5A4	Trichinella spiralis (Trichina worm)
	108	E5S729	Trichinella spiralis (Trichina worm)
	109	E5SUY8	Trichinella spiralis (Trichina worm)
	110	E5SHH8	Trichinella spiralis (Trichina worm)
	111	Q8T5Z5	Trichinella spiralis (Trichina worm)
	112	B7SIW4	Trichinella spiralis (Trichina worm)
	113	E5SBE0	Trichinella spiralis (Trichina worm)
	114	E5S2E9	Trichinella spiralis (Trichina worm)
	115	B0F9T3	Trichinella spiralis (Trichina worm)
	116	E5SWA1	Trichinella spiralis (Trichina worm)
	117	E5S2E7	Trichinella spiralis (Trichina worm)
	118	E5SK55	Trichinella spiralis (Trichina worm)
	119	E5S021	Trichinella spiralis (Trichina worm)
	120	E5SNY7	Trichinella spiralis (Trichina worm)
	121	E5S025	Trichinella spiralis (Trichina worm)
	122	B7SIW3	Trichinella spiralis (Trichina worm)
	123	E5S2E8	Trichinella spiralis (Trichina worm)
	124	E5SWD4	Trichinella spiralis (Trichina worm)
	125	E5SW98	Trichinella spiralis (Trichina worm)
	126	E5SAH1	Trichinella spiralis (Trichina worm)
	127	A1DYE9	Trichinella spiralis (Trichina worm)
	128	E5SGD5	Trichinella spiralis (Trichina worm)
	129	E5S7R2	Trichinella spiralis (Trichina worm)
	130	E5SPV4	Trichinella spiralis (Trichina worm)
	131	B0F9U0	Trichinella spiralis (Trichina worm)
	132	E5SE12	Trichinella spiralis (Trichina worm)
	133	E5T2Y0	Trichinella spiralis (Trichina worm)
	134	E5T8W5	Trichinella spiralis (Trichina worm)
	135	E5RYH5	Trichinella spiralis (Trichina worm)
	136	E5S9B5	Trichinella spiralis (Trichina worm)
	137	E5SK39	Trichinella spiralis (Trichina worm)
	138	E5SKN7	Trichinella spiralis (Trichina worm)
	139	E5S0H4	Trichinella spiralis (Trichina worm)
	140	E5S9N2	Trichinella spiralis (Trichina worm)
	141	E5SA00	Trichinella spiralis (Trichina worm)
	142	E5T3Z8	Trichinella spiralis (Trichina worm)
	143	E5SY21	Trichinella spiralis (Trichina worm)
	144	B0F9T4	Trichinella spiralis (Trichina worm)
	145	Q1M2M8	Glycyphagus domesticus (House itch mite)
	146	B7U5S6	Dermatophagoides farinae (American house dust mite)
	147	B7U5S5	Dermatophagoides farinae (American house dust mite)
	148	B7U5T0	Dermatophagoides farinae (American house dust mite)
	149	B7U5T1	Dermatophagoides farinae (American house dust mite)
	150	A1KXG4	Dermatophagoides farinae (American house dust mite)
	151	Q155V8	Dermatophagoides farinae (American house dust mite)
	152	B0KZK0	Acarus siro (Flour mite) (Tyroglyphus farinae)
	153	B0KZJ9	Acarus siro (Flour mite) (Tyroglyphus farinae)
	154	A2MJI2	Echinococcus granulosus (Hydatid tapeworm)
	155	A8NVE7	Brugia malayi (Filarial nematode worm)
	156	A8P933	Brugia malayi (Filarial nematode worm)
	157	A8Q2D0	Brugia malayi (Filarial nematode worm)
	158	A8QAT1	Brugia malayi (Filarial nematode worm)
	159	A8P5R0	Brugia malayi (Filarial nematode worm)
	160	A8Q028	Brugia malayi (Filarial nematode worm)
	161	A8QAS9	Brugia malayi (Filarial nematode worm)
	162	A8Q2D9	Brugia malayi (Filarial nematode worm)
	163	A8QC42	Brugia malayi (Filarial nematode worm)
	164	A8Q7N7	Brugia malayi (Filarial nematode worm)
	165	A8QEA1	Brugia malayi (Filarial nematode worm)
	166	A8P672	Brugia malayi (Filarial nematode worm)
	167	A8PLE7	Brugia malayi (Filarial nematode worm)
	168	A8PSK7	Brugia malayi (Filarial nematode worm)
	169	A8PV25	Brugia malayi (Filarial nematode worm)
	170	A8NDL6	Brugia malayi (Filarial nematode worm)
	171	A8P109	Brugia malayi (Filarial nematode worm)
	172	A8Q353	Brugia malayi (Filarial nematode worm)
	173	A8QGB5	Brugia malayi (Filarial nematode worm)
	174	A8NVY3	Brugia malayi (Filarial nematode worm)
	175	D5FM35	Brugia malayi (Filarial nematode worm)
	176	D5FM36	Brugia malayi (Filarial nematode worm)
	177	D5FM40	Brugia malayi (Filarial nematode worm)
	178	Q1WL52	Brugia malayi (Filarial nematode worm)
	179	U3RF04	Schistosoma japonicum (Blood fluke)
	180	Q5D9V2	Schistosoma japonicum (Blood fluke)
	181	C1L699	Schistosoma japonicum (Blood fluke)
	182	Q5DEK8	Schistosoma japonicum (Blood fluke)
	183	G8XRZ2	Schistosoma japonicum (Blood fluke)
	184	C1LJ72	Schistosoma japonicum (Blood fluke)
	185	Q5BZF0	Schistosoma japonicum (Blood fluke)
	186	C1LF14	Schistosoma japonicum (Blood fluke)
	187	C1LFP5	Schistosoma japonicum (Blood fluke)
	188	C1LEX9	Schistosoma japonicum (Blood fluke)
	189	U3RBS1	Schistosoma japonicum (Blood fluke)
	190	Q5DHM3	Schistosoma japonicum (Blood fluke)
	191	Q86FG7	Schistosoma japonicum (Blood fluke)
	192	C1LJ73	Schistosoma japonicum (Blood fluke)
	193	U3REZ9	Schistosoma japonicum (Blood fluke)
	194	U3R782	Schistosoma japonicum (Blood fluke)
	195	U3R753	Schistosoma japonicum (Blood fluke)
	196	U3R768	Schistosoma japonicum (Blood fluke)
	197	Q8I916	Blomia tropicalis (Mite)
	198	Q8MWR5	Dermatophagoides pteronyssinus (European house dust mite)
	199	Q7Z163	Dermatophagoides pteronyssinus (European house dust mite)
	200	A1KXI5	Blomia tropicalis (Mite)
	201	Q968Y2	Dermatophagoides pteronyssinus (European house dust mite)
	202	Q8MWR4	Dermatophagoides pteronyssinus (European house dust mite)
	203	A1KXI1	Blomia tropicalis (Mite)
	204	A1KXI3	Blomia tropicalis (Mite)
	205	Q1M2L7	Lepidoglyphus destructor (Fodder mite)
	206	Q2YFS7	Onchocerca volvulus
	207	Q6VPT0	Sarcoptes scabiei type hominis
	208	Q6VPT1	Sarcoptes scabiei type hominis
	209	Q6VPT2	Sarcoptes scabiei type hominis
	210	Q6VPT9	Sarcoptes scabiei type hominis
	211	Q6VPU3	Sarcoptes scabiei type hominis
	212	Q6VPU1	Sarcoptes scabiei type hominis
	213	Q6VPT8	Sarcoptes scabiei type hominis
	214	Q6VPU5	Sarcoptes scabiei type hominis
	215	Q6VPU4	Sarcoptes scabiei type hominis
	216	Q6VPT4	Sarcoptes scabiei type hominis
	217	Q6VPT3	Sarcoptes scabiei type hominis
	218	Q6VPU0	Sarcoptes scabiei type hominis
	219	Q6VPT5	Sarcoptes scabiei type hominis
	220	G1FCL4	Sarcoptes scabiei type hominis
	221	Q6VPT6	Sarcoptes scabiei type hominis
	222	Q6VPT7	Sarcoptes scabiei type hominis
	223	Q6VPU2	Sarcoptes scabiei type hominis
	224	Q6VPU6	Sarcoptes scabiei type hominis
	225	A7UNU2	Aleuroglyphus ovatus (brown legged grain mite)
	226	A7UNU4	Aleuroglyphus ovatus (brown legged grain mite)
	227	A7UNU1	Aleuroglyphus ovatus (brown legged grain mite)
	228	C6ZDB5	Tyrophagus putrescentiae (Dust mite)
	229	A7UNT8	Tyrophagus putrescentiae (Dust mite)
	230	A7UNU9	Tyrophagus putrescentiae (Dust mite)
	231	A7UNU8	Tyrophagus putrescentiae (Dust mite)
	232	Q9BKM6	Tyrophagus putrescentiae (Dust mite)
	233	Q9BKM5	Tyrophagus putrescentiae (Dust mite)
	234	Q8MUV6	Schistosoma haematobium (Blood fluke)
	235	Q8MUV5	Schistosoma haematobium (Blood fluke)
	236	G4VAG3	Schistosoma mansoni (Blood fluke)
	237	G4M0L5	Schistosoma mansoni (Blood fluke)
	238	G4VK39	Schistosoma mansoni (Blood fluke)
	239	G4VLL0	Schistosoma mansoni (Blood fluke)
	240	G4LZ22	Schistosoma mansoni (Blood fluke)
	241	G4M0X8	Schistosoma mansoni (Blood fluke)
	242	C4Q5F5	Schistosoma mansoni (Blood fluke)
	243	G4M153	Schistosoma mansoni (Blood fluke)
	244	G4VQ02	Schistosoma mansoni (Blood fluke)
	245	C4Q2F7	Schistosoma mansoni (Blood fluke)
	246	G4M1L3	Schistosoma mansoni (Blood fluke)
	247	O16007	Schistosoma mansoni (Blood fluke)
	248	Q9TYH4	Schistosoma mansoni (Blood fluke)
	249	Q26553	Schistosoma mansoni (Blood fluke)
	250	Q26552	Schistosoma mansoni (Blood fluke)
	251	G4VMB3	Schistosoma mansoni (Blood fluke)
	252	C4Q5F4	Schistosoma mansoni (Blood fluke)
	253	G4V855	Schistosoma mansoni (Blood fluke)
	254	G4M0X7	Schistosoma mansoni (Blood fluke)
	255	Q8MUV8	Schistosoma mansoni (Blood fluke)
	256	C4QUA1	Schistosoma mansoni (Blood fluke)
	257	G4M1L4	Schistosoma mansoni (Blood fluke)
	258	Q9XYW2	Schistosoma mansoni (Blood fluke)
	259	G4M1L5	Schistosoma mansoni (Blood fluke)
	260	E5LBB8	Taenia solium (Pork tapeworm)

## Sheet: Sheet7
	Sr. no.	Uniprot accession code, Homolgues of allergenic protein (Bet v1 ) in parasites	Organism
	1	A3F4Q9	Taenia asiatica (Asian tapeworm)
	2	A8NEV4	Brugia malayi (Filarial nematode worm)
	3	A8NPF9	Brugia malayi (Filarial nematode worm)
	4	A8P913	Brugia malayi (Filarial nematode worm)
	5	A8PBG8	Brugia malayi (Filarial nematode worm)
	6	A8PG94	Brugia malayi (Filarial nematode worm)
	7	A8PJS8	Brugia malayi (Filarial nematode worm)
	8	A8Q7R1	Brugia malayi (Filarial nematode worm)
	9	A8Q8N7	Brugia malayi (Filarial nematode worm)
	10	A8QE91	Brugia malayi (Filarial nematode worm)
	11	A8QFB2	Brugia malayi (Filarial nematode worm)
	12	C1LFM2	Schistosoma japonicum (Blood fluke)
	13	C1LNY0	Schistosoma japonicum (Blood fluke)
	14	C4Q6H2	Schistosoma mansoni (Blood fluke)
	15	C4QT89	Schistosoma mansoni (Blood fluke)
	16	E5S117	Trichinella spiralis (Trichina worm)
	17	E5S942	Trichinella spiralis (Trichina worm)
	18	E5SAI7	Trichinella spiralis (Trichina worm)
	19	E5SAK5	Trichinella spiralis (Trichina worm)
	20	E5SFL4	Trichinella spiralis (Trichina worm)
	21	E5SMW8	Trichinella spiralis (Trichina worm)
	22	E5SPH1	Trichinella spiralis (Trichina worm)
	23	F1KQ42	Ascaris suum (Pig roundworm) (Ascaris lumbricoides)
	24	F1KTC4	Ascaris suum (Pig roundworm) (Ascaris lumbricoides)
	25	F1KUW9	Ascaris suum (Pig roundworm) (Ascaris lumbricoides)
	26	F1KX01	Ascaris suum (Pig roundworm) (Ascaris lumbricoides)
	27	F1KZ74	Ascaris suum (Pig roundworm) (Ascaris lumbricoides)
	28	F1L0I5	Ascaris suum (Pig roundworm) (Ascaris lumbricoides)
	29	F1L5Z9	Ascaris suum (Pig roundworm) (Ascaris lumbricoides)
	30	F1L612	Ascaris suum (Pig roundworm) (Ascaris lumbricoides)
	31	F1L7L4	Ascaris suum (Pig roundworm) (Ascaris lumbricoides)
	32	F1L857	Ascaris suum (Pig roundworm) (Ascaris lumbricoides)
	33	F1L8G2	Ascaris suum (Pig roundworm) (Ascaris lumbricoides)
	34	F1L9F8	Ascaris suum (Pig roundworm) (Ascaris lumbricoides)
	35	F1L9R2	Ascaris suum (Pig roundworm) (Ascaris lumbricoides)
	36	F1LA59	Ascaris suum (Pig roundworm) (Ascaris lumbricoides)
	37	F1LCM1	Ascaris suum (Pig roundworm) (Ascaris lumbricoides)
	38	F1LCN3	Ascaris suum (Pig roundworm) (Ascaris lumbricoides)
	39	F1LCV3	Ascaris suum (Pig roundworm) (Ascaris lumbricoides)
	40	F1LD07	Ascaris suum (Pig roundworm) (Ascaris lumbricoides)
	41	F1LEA4	Ascaris suum (Pig roundworm) (Ascaris lumbricoides)
	42	G4LW97	Schistosoma mansoni (Blood fluke)
	43	G4LZU4	Schistosoma mansoni (Blood fluke)
	44	G4M1H7	Schistosoma mansoni (Blood fluke)
	45	G4V5B5	Schistosoma mansoni (Blood fluke)
	46	G4V7D7	Schistosoma mansoni (Blood fluke)
	47	G4V7D8	Schistosoma mansoni (Blood fluke)
	48	G4VE06	Schistosoma mansoni (Blood fluke)
	49	G4VG02	Schistosoma mansoni (Blood fluke)
	50	G4VGG2	Schistosoma mansoni (Blood fluke)
	51	G4VGG3	Schistosoma mansoni (Blood fluke)
	52	G4VGT6	Schistosoma mansoni (Blood fluke)
	53	G4VIB5	Schistosoma mansoni (Blood fluke)
	54	Q5C0B2	Schistosoma japonicum (Blood fluke)
	55	Q5DBK7	Schistosoma japonicum (Blood fluke)
	56	Q5DCR9	Schistosoma japonicum (Blood fluke)
	57	Q5DDT2	Schistosoma japonicum (Blood fluke)
	58	Q5DEY0	Schistosoma japonicum (Blood fluke)

## Sheet: Sheet8
	Sr. No.	Uniprot accession code, Homolgues of allergenic protein (Cupin) in parasites	Organism
	1	Q9U8F1	Schistosoma japonicum (Blood fluke)
	2	F1LA32	Ascaris suum (Pig roundworm) (Ascaris lumbricoides)
	3	F1KV71	Ascaris suum (Pig roundworm) (Ascaris lumbricoides)
	4	C1L6U9	Schistosoma japonicum (Blood fluke)
	5	A8QDK7	Brugia malayi (Filarial nematode worm)
	6	A8PY76	Brugia malayi (Filarial nematode worm)
	7	Q8I6Y7	Onchocerca volvulus
	8	F1KRF9	Ascaris suum (Pig roundworm) (Ascaris lumbricoides)
	9	F1KVW1	Ascaris suum (Pig roundworm) (Ascaris lumbricoides)
	10	F1L4I1	Ascaris suum (Pig roundworm) (Ascaris lumbricoides)
	11	F1L1B3	Ascaris suum (Pig roundworm) (Ascaris lumbricoides)
	12	F1L7J9	Ascaris suum (Pig roundworm) (Ascaris lumbricoides)
	13	F1KRB4	Ascaris suum (Pig roundworm) (Ascaris lumbricoides)
	14	F1KRT7	Ascaris suum (Pig roundworm) (Ascaris lumbricoides)
	15	F1L148	Ascaris suum (Pig roundworm) (Ascaris lumbricoides)
	16	F1L859	Ascaris suum (Pig roundworm) (Ascaris lumbricoides)
	17	F1L2C3	Ascaris suum (Pig roundworm) (Ascaris lumbricoides)
	18	F1KQD2	Ascaris suum (Pig roundworm) (Ascaris lumbricoides)
	19	F1LEU1	Ascaris suum (Pig roundworm) (Ascaris lumbricoides)
	20	F1KRI5	Ascaris suum (Pig roundworm) (Ascaris lumbricoides)
	21	F1KUB4	Ascaris suum (Pig roundworm) (Ascaris lumbricoides)
	22	F1L942	Ascaris suum (Pig roundworm) (Ascaris lumbricoides)
	23	F1L900	Ascaris suum (Pig roundworm) (Ascaris lumbricoides)
	24	F1LDG9	Ascaris suum (Pig roundworm) (Ascaris lumbricoides)
	25	F1KUD2	Ascaris suum (Pig roundworm) (Ascaris lumbricoides)
	26	F1L285	Ascaris suum (Pig roundworm) (Ascaris lumbricoides)
	27	F1LBJ4	Ascaris suum (Pig roundworm) (Ascaris lumbricoides)
	28	F1L3P4	Ascaris suum (Pig roundworm) (Ascaris lumbricoides)
	29	F1KWL0	Ascaris suum (Pig roundworm) (Ascaris lumbricoides)
	30	F1KYZ5	Ascaris suum (Pig roundworm) (Ascaris lumbricoides)
	31	F1LFJ3	Ascaris suum (Pig roundworm) (Ascaris lumbricoides)
	32	F1KX40	Ascaris suum (Pig roundworm) (Ascaris lumbricoides)
	33	E5S4S4	Trichinella spiralis (Trichina worm)
	34	E5S6D6	Trichinella spiralis (Trichina worm)
	35	E5S4Q4	Trichinella spiralis (Trichina worm)
	36	E5S5E1	Trichinella spiralis (Trichina worm)
	37	E5SID7	Trichinella spiralis (Trichina worm)
	38	E5SFN8	Trichinella spiralis (Trichina worm)
	39	E5S4S3	Trichinella spiralis (Trichina worm)
	40	Q9GSL4	Trichinella spiralis (Trichina worm)
	41	E5S481	Trichinella spiralis (Trichina worm)
	42	E5S6W8	Trichinella spiralis (Trichina worm)
	43	E5S111	Trichinella spiralis (Trichina worm)
	44	E5T074	Trichinella spiralis (Trichina worm)
	45	E5SHX1	Trichinella spiralis (Trichina worm)
	46	E5SNI6	Trichinella spiralis (Trichina worm)
	47	E5S6T6	Trichinella spiralis (Trichina worm)
	48	E5SCS2	Trichinella spiralis (Trichina worm)
	49	E5SYL5	Trichinella spiralis (Trichina worm)
	50	E5S4R6	Trichinella spiralis (Trichina worm)
	51	E5SBB9	Trichinella spiralis (Trichina worm)
	52	E5SMH7	Trichinella spiralis (Trichina worm)
	53	E5SCI6	Trichinella spiralis (Trichina worm)
	54	E5S687	Trichinella spiralis (Trichina worm)
	55	E5T5U8	Trichinella spiralis (Trichina worm)
	56	E5S1B7	Trichinella spiralis (Trichina worm)
	57	E5T2B4	Trichinella spiralis (Trichina worm)
	58	E5SCS3	Trichinella spiralis (Trichina worm)
	59	E5SFP9	Trichinella spiralis (Trichina worm)
	60	E5SI79	Trichinella spiralis (Trichina worm)
	61	A8NVE6	Brugia malayi (Filarial nematode worm)
	62	A8Q045	Brugia malayi (Filarial nematode worm)
	63	A8NMI1	Brugia malayi (Filarial nematode worm)
	64	A8PRG7	Brugia malayi (Filarial nematode worm)
	65	A8Q2S5	Brugia malayi (Filarial nematode worm)
	66	A8PR60	Brugia malayi (Filarial nematode worm)
	67	A8PTD2	Brugia malayi (Filarial nematode worm)
	68	A8P638	Brugia malayi (Filarial nematode worm)
	69	A8Q7L9	Brugia malayi (Filarial nematode worm)
	70	A8NEA2	Brugia malayi (Filarial nematode worm)
	71	A8QET5	Brugia malayi (Filarial nematode worm)
	72	A8NVG1	Brugia malayi (Filarial nematode worm)
	73	A8PCE1	Brugia malayi (Filarial nematode worm)
	74	A8P9S1	Brugia malayi (Filarial nematode worm)
	75	A8QH10	Brugia malayi (Filarial nematode worm)
	76	A8Q1N2	Brugia malayi (Filarial nematode worm)
	77	A8Q1B8	Brugia malayi (Filarial nematode worm)
	78	A8QGX3	Brugia malayi (Filarial nematode worm)
	79	A8QHQ8	Brugia malayi (Filarial nematode worm)
	80	Q5DE75	Schistosoma japonicum (Blood fluke)
	81	Q5DAR5	Schistosoma japonicum (Blood fluke)
	82	Q5C089	Schistosoma japonicum (Blood fluke)
	83	Q5BYU2	Schistosoma japonicum (Blood fluke)
	84	C1LFX7	Schistosoma japonicum (Blood fluke)
	85	Q5BZW5	Schistosoma japonicum (Blood fluke)
	86	Q5C0D1	Schistosoma japonicum (Blood fluke)
	87	Q5BWE1	Schistosoma japonicum (Blood fluke)
	88	C1LD90	Schistosoma japonicum (Blood fluke)
	89	C1LFU1	Schistosoma japonicum (Blood fluke)
	90	Q5DBI9	Schistosoma japonicum (Blood fluke)
	91	Q5BWD9	Schistosoma japonicum (Blood fluke)
	92	Q5D9E3	Schistosoma japonicum (Blood fluke)
	93	Q5DI18	Schistosoma japonicum (Blood fluke)
	94	C1LEI9	Schistosoma japonicum (Blood fluke)
	95	G4VMU7	Schistosoma mansoni (Blood fluke)
	96	G4LU88	Schistosoma mansoni (Blood fluke)
	97	G4LV34	Schistosoma mansoni (Blood fluke)
	98	G4LX39	Schistosoma mansoni (Blood fluke)
	99	G4VLZ1	Schistosoma mansoni (Blood fluke)
	100	G4VLL9	Schistosoma mansoni (Blood fluke)
	101	C1M2M7	Schistosoma mansoni (Blood fluke)
	102	C4Q351	Schistosoma mansoni (Blood fluke)
	103	G4VHF4	Schistosoma mansoni (Blood fluke)
	104	G4LY66	Schistosoma mansoni (Blood fluke)
	105	G4LZX4	Schistosoma mansoni (Blood fluke)
	106	G4VGD7	Schistosoma mansoni (Blood fluke)
	107	G4LZQ5	Schistosoma mansoni (Blood fluke)
	108	G4VS21	Schistosoma mansoni (Blood fluke)
	109	G4VSX7	Schistosoma mansoni (Blood fluke)
	110	G4V8K0	Schistosoma mansoni (Blood fluke)
	111	G4VAF9	Schistosoma mansoni (Blood fluke)
	112	G4V909	Schistosoma mansoni (Blood fluke)
	113	G4V5E0	Schistosoma mansoni (Blood fluke)
	114	G4M0M0	Schistosoma mansoni (Blood fluke)
	115	C4Q5J0	Schistosoma mansoni (Blood fluke)
	116	G4VT55	Schistosoma mansoni (Blood fluke)
	117	G4VK16	Schistosoma mansoni (Blood fluke)
	118	G4VBR0	Schistosoma mansoni (Blood fluke)
	119	G4V8K1	Schistosoma mansoni (Blood fluke)
	120	G4VMS5	Schistosoma mansoni (Blood fluke)
	121	G4VI71	Schistosoma mansoni (Blood fluke)
	122	G4LUM1	Schistosoma mansoni (Blood fluke)
	123	E7BBH9	Schistosoma mansoni (Blood fluke)
	124	G4VJW3	Schistosoma mansoni (Blood fluke)
	125	G4VCM1	Schistosoma mansoni (Blood fluke)
	126	G4VHI7	Schistosoma mansoni (Blood fluke)
	127	G4LUC8	Schistosoma mansoni (Blood fluke)
	128	G4V5R7	Schistosoma mansoni (Blood fluke)
	129	G4V5T8	Schistosoma mansoni (Blood fluke)
	130	G4VJW1	Schistosoma mansoni (Blood fluke)

## Sheet: Sheet9
	Sr. No.	Uniprot accession code, Distant homolgues of allergenic protein (Expansin) in parasites	Organism
	1	Q9U5P7	Glycyphagus domesticus (House itch mite)
	2	Q9NFQ4	Glycyphagus domesticus (House itch mite)
	3	Q00855	Dermatophagoides farinae (American house dust mite)
	4	P49278	Dermatophagoides pteronyssinus (European house dust mite)
	5	Q9TZZ2	Euroglyphus maynei (Mayne's house dust mite)
	6	P80384	Lepidoglyphus destructor (Fodder mite)
	7	Q965E2	Psoroptes ovis (Sheep scab mite)
	8	O02380	Tyrophagus putrescentiae (Dust mite)
	9	Q07160	Nippostrongylus brasiliensis (Rat hookworm)
	10	P13263	Onchocerca volvulus
	11	P13262	Onchocerca volvulus
	12	P29778	Onchocerca volvulus
	13	P29779	Onchocerca volvulus
	14	P31732	Onchocerca volvulus
	15	P12812	Schistosoma mansoni (Blood fluke)
	16	P24706	Onchocerca volvulus
	17	Q01137	Schistosoma mansoni (Blood fluke)
	18	Q07449	Onchocerca volvulus
	19	P16026	Schistosoma mansoni (Blood fluke)
	20	Q8MM53	Echinococcus granulosus (Hydatid tapeworm)
	21	F2YPM6	Echinococcus granulosus (Hydatid tapeworm)
	22	B9ZZQ3	Echinococcus granulosus (Hydatid tapeworm)
	23	D9J253	Echinococcus granulosus (Hydatid tapeworm)
	24	D9J242	Echinococcus granulosus (Hydatid tapeworm)
	25	D9J238	Echinococcus granulosus (Hydatid tapeworm)
	26	D9J245	Echinococcus granulosus (Hydatid tapeworm)
	27	D9J247	Echinococcus granulosus (Hydatid tapeworm)
	28	D9J248	Echinococcus granulosus (Hydatid tapeworm)
	29	B2LXX6	Echinococcus granulosus (Hydatid tapeworm)
	30	B2LY23	Echinococcus granulosus (Hydatid tapeworm)
	31	B2LXY0	Echinococcus granulosus (Hydatid tapeworm)
	32	B2LXX1	Echinococcus granulosus (Hydatid tapeworm)
	33	B2LXY6	Echinococcus granulosus (Hydatid tapeworm)
	34	Q9GND7	Echinococcus granulosus (Hydatid tapeworm)
	35	B2LY24	Echinococcus granulosus (Hydatid tapeworm)
	36	B2LXX5	Echinococcus granulosus (Hydatid tapeworm)
	37	H9NA88	Echinococcus granulosus (Hydatid tapeworm)
	38	Q5VJF7	Echinococcus granulosus (Hydatid tapeworm)
	39	A5X5X4	Dermatophagoides farinae (American house dust mite)
	40	Q5TIW1	Dermatophagoides farinae (American house dust mite)
	41	C1IWC1	Dermatophagoides pteronyssinus (European house dust mite)
	42	Q3HWZ3	Dermatophagoides pteronyssinus (European house dust mite)
	43	E5SXI1	Trichinella spiralis (Trichina worm)
	44	C1LAQ2	Schistosoma japonicum (Blood fluke)
	45	C1LAP0	Schistosoma japonicum (Blood fluke)
	46	C1LAQ9	Schistosoma japonicum (Blood fluke)
	47	C1LNY3	Schistosoma japonicum (Blood fluke)
	48	C1LAQ4	Schistosoma japonicum (Blood fluke)
	49	G9B123	Schistosoma japonicum (Blood fluke)
	50	Q9B8Z2	Schistosoma japonicum (Blood fluke)
	51	Q5DFB7	Schistosoma japonicum (Blood fluke)
	52	Q5DCB9	Schistosoma japonicum (Blood fluke)
	53	Q5DHP4	Schistosoma japonicum (Blood fluke)
	54	Q9B8A2	Trichinella spiralis (Trichina worm)
	55	C1LQ27	Schistosoma japonicum (Blood fluke)
	56	Q9MEU5	Schistosoma haematobium (Blood fluke)
	57	C7TXU3	Schistosoma japonicum (Blood fluke)
	58	C1L5R4	Schistosoma japonicum (Blood fluke)
	59	Q5DCC6	Schistosoma japonicum (Blood fluke)
	60	C1LCN7	Schistosoma japonicum (Blood fluke)
	61	Q5DE66	Schistosoma japonicum (Blood fluke)
	62	C1LHS0	Schistosoma japonicum (Blood fluke)
	63	C7TZA0	Schistosoma japonicum (Blood fluke)
	64	Q5DFZ4	Schistosoma japonicum (Blood fluke)
	65	Q5DDT1	Schistosoma japonicum (Blood fluke)
	66	Q5DHY8	Schistosoma japonicum (Blood fluke)
	67	A8Q4I2	Brugia malayi (Filarial nematode worm)
	68	A8QGS4	Brugia malayi (Filarial nematode worm)
	69	A8PN33	Brugia malayi (Filarial nematode worm)
	70	Q66M65	Brugia malayi (Filarial nematode worm)
	71	A8PIJ7	Brugia malayi (Filarial nematode worm)
	72	A8NQ56	Brugia malayi (Filarial nematode worm)
	73	A8P0X0	Brugia malayi (Filarial nematode worm)
	74	A8PQE7	Brugia malayi (Filarial nematode worm)
	75	A8NGN3	Brugia malayi (Filarial nematode worm)
	76	Q9GNI0	Mansonella ozzardi
	77	O18483	Onchocerca volvulus
	78	C4Q5U5	Schistosoma mansoni (Blood fluke)
	79	C4PYZ0	Schistosoma mansoni (Blood fluke)
	80	G4V8Y2	Schistosoma mansoni (Blood fluke)
	81	C4PY08	Schistosoma mansoni (Blood fluke)
	82	Q27334	Onchocerca volvulus
	83	Q9MD49	Schistosoma mansoni (Blood fluke)
	84	F5BYW2	Anisakis simplex (Herring worm)
	85	F5BZ24	Anisakis simplex C Nascetti et al., 1986
	86	E5SCP5	Trichinella spiralis (Trichina worm)
	87	E5S2V5	Trichinella spiralis (Trichina worm)
	88	E5S2U7	Trichinella spiralis (Trichina worm)
	89	E5SD76	Trichinella spiralis (Trichina worm)
	90	E5S120	Trichinella spiralis (Trichina worm)
	91	E5SRY1	Trichinella spiralis (Trichina worm)
	92	E5S291	Trichinella spiralis (Trichina worm)
	93	E5S9H2	Trichinella spiralis (Trichina worm)
	94	E5SCP4	Trichinella spiralis (Trichina worm)
	95	E5SJ56	Trichinella spiralis (Trichina worm)
	96	E5S3T5	Trichinella spiralis (Trichina worm)
	97	E5SL90	Trichinella spiralis (Trichina worm)
	98	E5SXR4	Trichinella spiralis (Trichina worm)
	99	E5SX09	Trichinella spiralis (Trichina worm)
	100	E5RYT1	Trichinella spiralis (Trichina worm)
	101	E5SP53	Trichinella spiralis (Trichina worm)
	102	E5SNZ9	Trichinella spiralis (Trichina worm)
	103	E5SK45	Trichinella spiralis (Trichina worm)
	104	E5SQW0	Trichinella spiralis (Trichina worm)
	105	E5SYZ5	Trichinella spiralis (Trichina worm)
	106	E5SB10	Trichinella spiralis (Trichina worm)
	107	E5T7I0	Trichinella spiralis (Trichina worm)
	108	E5S4K9	Trichinella spiralis (Trichina worm)
	109	E5SGM2	Trichinella spiralis (Trichina worm)
	110	E5SA26	Trichinella spiralis (Trichina worm)
	111	E5SMS4	Trichinella spiralis (Trichina worm)
	112	E5STJ9	Trichinella spiralis (Trichina worm)
	113	E5SF27	Trichinella spiralis (Trichina worm)
	114	E5RZT8	Trichinella spiralis (Trichina worm)
	115	E5SEG5	Trichinella spiralis (Trichina worm)
	116	E5S432	Trichinella spiralis (Trichina worm)
	117	E5S8I3	Trichinella spiralis (Trichina worm)
	118	E5RYG1	Trichinella spiralis (Trichina worm)
	119	E5T214	Trichinella spiralis (Trichina worm)
	120	E5S8C2	Trichinella spiralis (Trichina worm)
	121	E5STN0	Trichinella spiralis (Trichina worm)
	122	E5ST67	Trichinella spiralis (Trichina worm)
	123	E5SA29	Trichinella spiralis (Trichina worm)
	124	E5SYZ6	Trichinella spiralis (Trichina worm)
	125	E5SAJ2	Trichinella spiralis (Trichina worm)
	126	E5SXF4	Trichinella spiralis (Trichina worm)
	127	E5SGS6	Trichinella spiralis (Trichina worm)
	128	E5STD2	Trichinella spiralis (Trichina worm)
	129	E5S0C9	Trichinella spiralis (Trichina worm)
	130	E5SZJ8	Trichinella spiralis (Trichina worm)
	131	E5T119	Trichinella spiralis (Trichina worm)
	132	E5SSI7	Trichinella spiralis (Trichina worm)
	133	E5SWS1	Trichinella spiralis (Trichina worm)
	134	E5SC33	Trichinella spiralis (Trichina worm)
	135	E5SED3	Trichinella spiralis (Trichina worm)
	136	E5RYT6	Trichinella spiralis (Trichina worm)
	137	E5SYZ4	Trichinella spiralis (Trichina worm)
	138	E5SWB0	Trichinella spiralis (Trichina worm)
	139	E5S7A2	Trichinella spiralis (Trichina worm)
	140	E5SC14	Trichinella spiralis (Trichina worm)
	141	E5SAH9	Trichinella spiralis (Trichina worm)
	142	E5SWB2	Trichinella spiralis (Trichina worm)
	143	E5S2B0	Trichinella spiralis (Trichina worm)
	144	E5SAI5	Trichinella spiralis (Trichina worm)
	145	E5SIF7	Trichinella spiralis (Trichina worm)
	146	E5SWW7	Trichinella spiralis (Trichina worm)
	147	E5RYP2	Trichinella spiralis (Trichina worm)
	148	E5RYN8	Trichinella spiralis (Trichina worm)
	149	E5STY8	Trichinella spiralis (Trichina worm)
	150	E5SB85	Trichinella spiralis (Trichina worm)
	151	E5SW28	Trichinella spiralis (Trichina worm)
	152	E5T2N0	Trichinella spiralis (Trichina worm)
	153	E5SCD0	Trichinella spiralis (Trichina worm)
	154	E5SIV8	Trichinella spiralis (Trichina worm)
	155	E5SCJ4	Trichinella spiralis (Trichina worm)
	156	E5SL06	Trichinella spiralis (Trichina worm)
	157	E5T0H5	Trichinella spiralis (Trichina worm)
	158	E5S6P5	Trichinella spiralis (Trichina worm)
	159	E5S7E3	Trichinella spiralis (Trichina worm)
	160	E5SK07	Trichinella spiralis (Trichina worm)
	161	E5S150	Trichinella spiralis (Trichina worm)
	162	E5SKI5	Trichinella spiralis (Trichina worm)
	163	E5SRL7	Trichinella spiralis (Trichina worm)
	164	E5SYB9	Trichinella spiralis (Trichina worm)
	165	E5SKX9	Trichinella spiralis (Trichina worm)
	166	E5S8L9	Trichinella spiralis (Trichina worm)
	167	E5SLC8	Trichinella spiralis (Trichina worm)
	168	E5SLK4	Trichinella spiralis (Trichina worm)
	169	E5S281	Trichinella spiralis (Trichina worm)
	170	E5SZX8	Trichinella spiralis (Trichina worm)
	171	E5S9Q5	Trichinella spiralis (Trichina worm)
	172	E5SU77	Trichinella spiralis (Trichina worm)
	173	E5T0I7	Trichinella spiralis (Trichina worm)
	174	E5S3T7	Trichinella spiralis (Trichina worm)
	175	E5S4H0	Trichinella spiralis (Trichina worm)
	176	E5S4H1	Trichinella spiralis (Trichina worm)
	177	E5SNJ2	Trichinella spiralis (Trichina worm)
	178	E5T1T7	Trichinella spiralis (Trichina worm)
	179	E5RZI8	Trichinella spiralis (Trichina worm)
	180	E5SXU9	Trichinella spiralis (Trichina worm)
	181	E5S102	Trichinella spiralis (Trichina worm)
	182	E5S5Q3	Trichinella spiralis (Trichina worm)
	183	E5SEN4	Trichinella spiralis (Trichina worm)
	184	E5SJU8	Trichinella spiralis (Trichina worm)
	185	E5T110	Trichinella spiralis (Trichina worm)
	186	E5S3T6	Trichinella spiralis (Trichina worm)
	187	Q000T3	Trichinella spiralis (Trichina worm)
	188	E5SIG6	Trichinella spiralis (Trichina worm)
	189	E5SLB9	Trichinella spiralis (Trichina worm)
	190	E5S5J4	Trichinella spiralis (Trichina worm)
	191	E5SJA4	Trichinella spiralis (Trichina worm)
	192	E5SRA4	Trichinella spiralis (Trichina worm)
	193	E5S1W3	Trichinella spiralis (Trichina worm)
	194	E5S4G5	Trichinella spiralis (Trichina worm)
	195	E5SDN2	Trichinella spiralis (Trichina worm)
	196	E5SLB6	Trichinella spiralis (Trichina worm)
	197	E5S5X1	Trichinella spiralis (Trichina worm)
	198	E5SCL4	Trichinella spiralis (Trichina worm)
	199	E5STU3	Trichinella spiralis (Trichina worm)
	200	E5S5G6	Trichinella spiralis (Trichina worm)
	201	E5S944	Trichinella spiralis (Trichina worm)
	202	E5S4C2	Trichinella spiralis (Trichina worm)
	203	E5SNU2	Trichinella spiralis (Trichina worm)
	204	E5SV51	Trichinella spiralis (Trichina worm)
	205	E5RZQ6	Trichinella spiralis (Trichina worm)
	206	E5S1M1	Trichinella spiralis (Trichina worm)
	207	E5SQK7	Trichinella spiralis (Trichina worm)
	208	E5S5Q5	Trichinella spiralis (Trichina worm)
	209	E5S348	Trichinella spiralis (Trichina worm)
	210	E5S4I9	Trichinella spiralis (Trichina worm)
	211	E5S6N2	Trichinella spiralis (Trichina worm)
	212	E5SAI1	Trichinella spiralis (Trichina worm)
	213	E5SRB0	Trichinella spiralis (Trichina worm)
	214	E5T1D1	Trichinella spiralis (Trichina worm)
	215	E5SP41	Trichinella spiralis (Trichina worm)
	216	E5T0Q8	Trichinella spiralis (Trichina worm)
	217	E5S1Y1	Trichinella spiralis (Trichina worm)
	218	E5RZ76	Trichinella spiralis (Trichina worm)
	219	E5S7P0	Trichinella spiralis (Trichina worm)
	220	E5SL27	Trichinella spiralis (Trichina worm)
	221	E5SSN8	Trichinella spiralis (Trichina worm)
	222	E5SI94	Trichinella spiralis (Trichina worm)
	223	E5T038	Trichinella spiralis (Trichina worm)
	224	E5SVA9	Trichinella spiralis (Trichina worm)
	225	E5T643	Trichinella spiralis (Trichina worm)
	226	E5S590	Trichinella spiralis (Trichina worm)
	227	E5SJG9	Trichinella spiralis (Trichina worm)
	228	E5SRA8	Trichinella spiralis (Trichina worm)
	229	E5S4U5	Trichinella spiralis (Trichina worm)
	230	E5SGH3	Trichinella spiralis (Trichina worm)
	231	E5T5W2	Trichinella spiralis (Trichina worm)
	232	E5T7N2	Trichinella spiralis (Trichina worm)
	233	E5S7B6	Trichinella spiralis (Trichina worm)
	234	E5SLD4	Trichinella spiralis (Trichina worm)
	235	E5S3Q5	Trichinella spiralis (Trichina worm)
	236	E5ST69	Trichinella spiralis (Trichina worm)
	237	E5SJM0	Trichinella spiralis (Trichina worm)
	238	E5SEI5	Trichinella spiralis (Trichina worm)
	239	E5T5S4	Trichinella spiralis (Trichina worm)
	240	E5SG81	Trichinella spiralis (Trichina worm)
	241	E5SMA6	Trichinella spiralis (Trichina worm)
	242	E5SY61	Trichinella spiralis (Trichina worm)
	243	E5RYY5	Trichinella spiralis (Trichina worm)
	244	E5SJC6	Trichinella spiralis (Trichina worm)
	245	E5S843	Trichinella spiralis (Trichina worm)
	246	E5SEA9	Trichinella spiralis (Trichina worm)
	247	E5SSQ7	Trichinella spiralis (Trichina worm)
	248	E5RYU5	Trichinella spiralis (Trichina worm)
	249	E5SA90	Trichinella spiralis (Trichina worm)
	250	E5T066	Trichinella spiralis (Trichina worm)
	251	E5SIH8	Trichinella spiralis (Trichina worm)
	252	E5SQM2	Trichinella spiralis (Trichina worm)
	253	E5SHA5	Trichinella spiralis (Trichina worm)
	254	E5SLB5	Trichinella spiralis (Trichina worm)
	255	E5SUC1	Trichinella spiralis (Trichina worm)
	256	E5SGU5	Trichinella spiralis (Trichina worm)
	257	E5S3B4	Trichinella spiralis (Trichina worm)
	258	E5SKI3	Trichinella spiralis (Trichina worm)
	259	E5SMA7	Trichinella spiralis (Trichina worm)
	260	E5SP99	Trichinella spiralis (Trichina worm)
	261	E5S1E0	Trichinella spiralis (Trichina worm)
	262	E5SK75	Trichinella spiralis (Trichina worm)
	263	E5SHV9	Trichinella spiralis (Trichina worm)
	264	E5S2A6	Trichinella spiralis (Trichina worm)
	265	E5SS93	Trichinella spiralis (Trichina worm)
	266	E5SNJ4	Trichinella spiralis (Trichina worm)
	267	E5T326	Trichinella spiralis (Trichina worm)
	268	E5S2J3	Trichinella spiralis (Trichina worm)
	269	E5SCF4	Trichinella spiralis (Trichina worm)
	270	E5S2Y1	Trichinella spiralis (Trichina worm)
	271	E5S7K5	Trichinella spiralis (Trichina worm)
	272	E5S9F9	Trichinella spiralis (Trichina worm)
	273	E5SA43	Trichinella spiralis (Trichina worm)
	274	E5SN53	Trichinella spiralis (Trichina worm)
	275	E5T4Z8	Trichinella spiralis (Trichina worm)
	276	E5SJB1	Trichinella spiralis (Trichina worm)
	277	E5S0Y3	Trichinella spiralis (Trichina worm)
	278	E5S0Y4	Trichinella spiralis (Trichina worm)
	279	E5S5H8	Trichinella spiralis (Trichina worm)
	280	E5SKY3	Trichinella spiralis (Trichina worm)
	281	E5SNM1	Trichinella spiralis (Trichina worm)
	282	E5SLN4	Trichinella spiralis (Trichina worm)
	283	E5SC71	Trichinella spiralis (Trichina worm)
	284	E5SP45	Trichinella spiralis (Trichina worm)
	285	E5S492	Trichinella spiralis (Trichina worm)
	286	E5SQN2	Trichinella spiralis (Trichina worm)
	287	E5SND7	Trichinella spiralis (Trichina worm)
	288	E5T8J5	Trichinella spiralis (Trichina worm)
	289	E5S6L9	Trichinella spiralis (Trichina worm)
	290	E5T2H4	Trichinella spiralis (Trichina worm)
	291	E5RZS3	Trichinella spiralis (Trichina worm)
	292	E5SID3	Trichinella spiralis (Trichina worm)
	293	E5SFK3	Trichinella spiralis (Trichina worm)
	294	E5S532	Trichinella spiralis (Trichina worm)
	295	E5SRT3	Trichinella spiralis (Trichina worm)
	296	E5S962	Trichinella spiralis (Trichina worm)
	297	E5T213	Trichinella spiralis (Trichina worm)
	298	E5ST68	Trichinella spiralis (Trichina worm)
	299	E5SY95	Trichinella spiralis (Trichina worm)
	300	E5S6N8	Trichinella spiralis (Trichina worm)
	301	E5SL26	Trichinella spiralis (Trichina worm)
	302	E5S0Y7	Trichinella spiralis (Trichina worm)
	303	E5SNY5	Trichinella spiralis (Trichina worm)
	304	E5SI28	Trichinella spiralis (Trichina worm)
	305	E5T3Y9	Trichinella spiralis (Trichina worm)
	306	E5S938	Trichinella spiralis (Trichina worm)
	307	E5SLD3	Trichinella spiralis (Trichina worm)
	308	E5SVP8	Trichinella spiralis (Trichina worm)
	309	E5SWW8	Trichinella spiralis (Trichina worm)
	310	E5SD09	Trichinella spiralis (Trichina worm)
	311	E5S732	Trichinella spiralis (Trichina worm)
	312	E5SSA2	Trichinella spiralis (Trichina worm)
	313	E5S960	Trichinella spiralis (Trichina worm)
	314	E5T6P8	Trichinella spiralis (Trichina worm)
	315	E5SLN6	Trichinella spiralis (Trichina worm)
	316	E5S0B5	Trichinella spiralis (Trichina worm)
	317	E5S2L6	Trichinella spiralis (Trichina worm)
	318	E5SCP9	Trichinella spiralis (Trichina worm)
	319	E5SLU2	Trichinella spiralis (Trichina worm)
	320	E5T234	Trichinella spiralis (Trichina worm)
	321	E5S4K6	Trichinella spiralis (Trichina worm)
	322	E5SR09	Trichinella spiralis (Trichina worm)
	323	E5SBF2	Trichinella spiralis (Trichina worm)
	324	E5T4G9	Trichinella spiralis (Trichina worm)
	325	E5S2A4	Trichinella spiralis (Trichina worm)
	326	E5SFK2	Trichinella spiralis (Trichina worm)
	327	E5SKY0	Trichinella spiralis (Trichina worm)
	328	E5SMU5	Trichinella spiralis (Trichina worm)
	329	E5SU41	Trichinella spiralis (Trichina worm)
	330	E5SQL0	Trichinella spiralis (Trichina worm)
	331	E5S4P7	Trichinella spiralis (Trichina worm)
	332	E5SRC8	Trichinella spiralis (Trichina worm)
	333	E5SRH8	Trichinella spiralis (Trichina worm)
	334	E5SIB3	Trichinella spiralis (Trichina worm)
	335	E5SV26	Trichinella spiralis (Trichina worm)
	336	E5S1Y0	Trichinella spiralis (Trichina worm)
	337	E5T7V9	Trichinella spiralis (Trichina worm)
	338	E5SJB2	Trichinella spiralis (Trichina worm)
	339	E5S100	Trichinella spiralis (Trichina worm)
	340	E5SLB3	Trichinella spiralis (Trichina worm)
	341	E5SHU1	Trichinella spiralis (Trichina worm)
	342	E5RZS9	Trichinella spiralis (Trichina worm)
	343	E5SRH9	Trichinella spiralis (Trichina worm)
	344	E5SKI4	Trichinella spiralis (Trichina worm)
	345	E5SLZ5	Trichinella spiralis (Trichina worm)
	346	E5SMU6	Trichinella spiralis (Trichina worm)
	347	E5SSE8	Trichinella spiralis (Trichina worm)
	348	E5S299	Trichinella spiralis (Trichina worm)
	349	E5S011	Trichinella spiralis (Trichina worm)
	350	E5S5F0	Trichinella spiralis (Trichina worm)
	351	E5SE75	Trichinella spiralis (Trichina worm)
	352	E5T9D9	Trichinella spiralis (Trichina worm)
	353	E5S1U2	Trichinella spiralis (Trichina worm)
	354	E5SKC4	Trichinella spiralis (Trichina worm)
	355	E5T0F5	Trichinella spiralis (Trichina worm)
	356	E5SK40	Trichinella spiralis (Trichina worm)
	357	E5S0Z9	Trichinella spiralis (Trichina worm)
	358	E5S5C7	Trichinella spiralis (Trichina worm)
	359	E5SCK7	Trichinella spiralis (Trichina worm)
	360	E5SBM6	Trichinella spiralis (Trichina worm)
	361	E5SIE6	Trichinella spiralis (Trichina worm)
	362	E5SY02	Trichinella spiralis (Trichina worm)
	363	Q6YBW0	Trichinella spiralis (Trichina worm)
	364	E5SFW5	Trichinella spiralis (Trichina worm)
	365	E5T824	Trichinella spiralis (Trichina worm)
	366	E5SQ83	Trichinella spiralis (Trichina worm)
	367	E5SZS1	Trichinella spiralis (Trichina worm)
	368	E5STH5	Trichinella spiralis (Trichina worm)
	369	E5SQG6	Trichinella spiralis (Trichina worm)
	370	E5SR51	Trichinella spiralis (Trichina worm)
	371	E5SRN2	Trichinella spiralis (Trichina worm)
	372	E5S6Y8	Trichinella spiralis (Trichina worm)
	373	E5SS46	Trichinella spiralis (Trichina worm)
	374	E5SXW3	Trichinella spiralis (Trichina worm)
	375	E5SP40	Trichinella spiralis (Trichina worm)
	376	E5SB50	Trichinella spiralis (Trichina worm)
	377	E5SI27	Trichinella spiralis (Trichina worm)
	378	E5SFE3	Trichinella spiralis (Trichina worm)
	379	E5RZ48	Trichinella spiralis (Trichina worm)
	380	E5SDW6	Trichinella spiralis (Trichina worm)
	381	E5ST90	Trichinella spiralis (Trichina worm)
	382	E5ST31	Trichinella spiralis (Trichina worm)
	383	E5SB93	Trichinella spiralis (Trichina worm)
	384	E5S239	Trichinella spiralis (Trichina worm)
	385	E5SA44	Trichinella spiralis (Trichina worm)
	386	E5SID5	Trichinella spiralis (Trichina worm)
	387	E5STG0	Trichinella spiralis (Trichina worm)
	388	E5T8V4	Trichinella spiralis (Trichina worm)
	389	E5SA63	Trichinella spiralis (Trichina worm)
	390	E5SAW2	Trichinella spiralis (Trichina worm)
	391	E5T6S0	Trichinella spiralis (Trichina worm)
	392	E5SXY8	Trichinella spiralis (Trichina worm)
	393	E5SFZ7	Trichinella spiralis (Trichina worm)
	394	E5STJ6	Trichinella spiralis (Trichina worm)
	395	E5SLI5	Trichinella spiralis (Trichina worm)
	396	Q1M2M9	Glycyphagus domesticus (House itch mite)
	397	Q5TIW0	Dermatophagoides farinae (American house dust mite)
	398	C8CP88	Dermatophagoides farinae (American house dust mite)
	399	A1YW17	Dermatophagoides farinae (American house dust mite)
	400	Q5TIW2	Dermatophagoides farinae (American house dust mite)
	401	A7XXV2	Dermatophagoides farinae (American house dust mite)
	402	Q8WQK5	Dermatophagoides farinae (American house dust mite)
	403	I2CMD9	Dermatophagoides farinae (American house dust mite)
	404	A1KXH0	Dermatophagoides farinae (American house dust mite)
	405	A1YW16	Dermatophagoides farinae (American house dust mite)
	406	Q5R1T7	Dermatophagoides farinae (American house dust mite)
	407	Q3HWZ2	Dermatophagoides farinae (American house dust mite)
	408	A3F5F1	Dermatophagoides farinae (American house dust mite)
	409	A1YW14	Dermatophagoides farinae (American house dust mite)
	410	H9L983	Trichuris trichiura (Whipworm) (Trichocephalus trichiurus)
	411	B0KZK1	Acarus siro (Flour mite) (Tyroglyphus farinae)
	412	A7XZG9	Acarus siro (Flour mite) (Tyroglyphus farinae)
	413	A7XZH1	Acarus siro (Flour mite) (Tyroglyphus farinae)
	414	Q9XY94	Fasciola hepatica (Liver fluke)
	415	B2LXX3	Echinococcus granulosus (Hydatid tapeworm)
	416	B2LXY5	Echinococcus granulosus (Hydatid tapeworm)
	417	B2LXX4	Echinococcus granulosus (Hydatid tapeworm)
	418	D9J251	Echinococcus granulosus (Hydatid tapeworm)
	419	D9J250	Echinococcus granulosus (Hydatid tapeworm)
	420	Q6TGN1	Echinococcus granulosus (Hydatid tapeworm)
	421	B2LXX2	Echinococcus granulosus (Hydatid tapeworm)
	422	B2LXX7	Echinococcus granulosus (Hydatid tapeworm)
	423	D9J237	Echinococcus granulosus (Hydatid tapeworm)
	424	Q6TGM9	Echinococcus granulosus (Hydatid tapeworm)
	425	Q9G7W9	Echinococcus granulosus (Hydatid tapeworm)
	426	Q958U1	Echinococcus granulosus (Hydatid tapeworm)
	427	B2LXY4	Echinococcus granulosus (Hydatid tapeworm)
	428	Q6TGN0	Echinococcus granulosus (Hydatid tapeworm)
	429	Q8MV08	Echinococcus granulosus (Hydatid tapeworm)
	430	B2LXX9	Echinococcus granulosus (Hydatid tapeworm)
	431	B2LXY3	Echinococcus granulosus (Hydatid tapeworm)
	432	Q8MV07	Echinococcus granulosus (Hydatid tapeworm)
	433	Q9B8Y1	Fasciola hepatica (Liver fluke)
	434	D9J235	Echinococcus granulosus (Hydatid tapeworm)
	435	D9J236	Echinococcus granulosus (Hydatid tapeworm)
	436	Q8MV05	Echinococcus granulosus (Hydatid tapeworm)
	437	H9M5Q1	Echinococcus granulosus (Hydatid tapeworm)
	438	H9NA86	Echinococcus granulosus (Hydatid tapeworm)
	439	B2LY26	Echinococcus granulosus (Hydatid tapeworm)
	440	D9J249	Echinococcus granulosus (Hydatid tapeworm)
	441	B8R1B2	Fasciola hepatica (Liver fluke)
	442	B2LXY9	Echinococcus granulosus (Hydatid tapeworm)
	443	Q9GQU2	Echinococcus granulosus (Hydatid tapeworm)
	444	D9J244	Echinococcus granulosus (Hydatid tapeworm)
	445	Q9GQU1	Echinococcus granulosus (Hydatid tapeworm)
	446	B4UUJ1	Echinococcus granulosus (Hydatid tapeworm)
	447	D9J259	Echinococcus granulosus (Hydatid tapeworm)
	448	A8Q6Y7	Brugia malayi (Filarial nematode worm)
	449	A8PTW8	Brugia malayi (Filarial nematode worm)
	450	A8QDS3	Brugia malayi (Filarial nematode worm)
	451	A8NIW1	Brugia malayi (Filarial nematode worm)
	452	A8NU55	Brugia malayi (Filarial nematode worm)
	453	A8Q2A9	Brugia malayi (Filarial nematode worm)
	454	A8NZ97	Brugia malayi (Filarial nematode worm)
	455	A8NH02	Brugia malayi (Filarial nematode worm)
	456	A8NPN6	Brugia malayi (Filarial nematode worm)
	457	A8PDJ4	Brugia malayi (Filarial nematode worm)
	458	A8PTP1	Brugia malayi (Filarial nematode worm)
	459	A8Q2I9	Brugia malayi (Filarial nematode worm)
	460	A8QAR0	Brugia malayi (Filarial nematode worm)
	461	A8PU11	Brugia malayi (Filarial nematode worm)
	462	A8PTW4	Brugia malayi (Filarial nematode worm)
	463	A8PLR5	Brugia malayi (Filarial nematode worm)
	464	A8Q0T1	Brugia malayi (Filarial nematode worm)
	465	A8NSL1	Brugia malayi (Filarial nematode worm)
	466	A8P3Y8	Brugia malayi (Filarial nematode worm)
	467	A8PM32	Brugia malayi (Filarial nematode worm)
	468	A8PZI4	Brugia malayi (Filarial nematode worm)
	469	A8P9H0	Brugia malayi (Filarial nematode worm)
	470	A8Q018	Brugia malayi (Filarial nematode worm)
	471	A8QC58	Brugia malayi (Filarial nematode worm)
	472	A8Q185	Brugia malayi (Filarial nematode worm)
	473	A8QGN3	Brugia malayi (Filarial nematode worm)
	474	A8NHN9	Brugia malayi (Filarial nematode worm)
	475	A8PYH4	Brugia malayi (Filarial nematode worm)
	476	A8PZE5	Brugia malayi (Filarial nematode worm)
	477	A8Q8H1	Brugia malayi (Filarial nematode worm)
	478	A8QH90	Brugia malayi (Filarial nematode worm)
	479	A8NZQ9	Brugia malayi (Filarial nematode worm)
	480	A8QF73	Brugia malayi (Filarial nematode worm)
	481	A8PB56	Brugia malayi (Filarial nematode worm)
	482	A8Q3U8	Brugia malayi (Filarial nematode worm)
	483	A8Q8T8	Brugia malayi (Filarial nematode worm)
	484	A8PYW8	Brugia malayi (Filarial nematode worm)
	485	A8Q5K0	Brugia malayi (Filarial nematode worm)
	486	A8Q5Z1	Brugia malayi (Filarial nematode worm)
	487	A8PM19	Brugia malayi (Filarial nematode worm)
	488	A8P0S4	Brugia malayi (Filarial nematode worm)
	489	A8P746	Brugia malayi (Filarial nematode worm)
	490	A8P5F6	Brugia malayi (Filarial nematode worm)
	491	A8QF25	Brugia malayi (Filarial nematode worm)
	492	A8PI48	Brugia malayi (Filarial nematode worm)
	493	A8QGM5	Brugia malayi (Filarial nematode worm)
	494	A8P8G3	Brugia malayi (Filarial nematode worm)
	495	A8QEQ9	Brugia malayi (Filarial nematode worm)
	496	A8PPB7	Brugia malayi (Filarial nematode worm)
	497	A8QFR9	Brugia malayi (Filarial nematode worm)
	498	A8NIW5	Brugia malayi (Filarial nematode worm)
	499	A8P9Y0	Brugia malayi (Filarial nematode worm)
	500	A8PZF8	Brugia malayi (Filarial nematode worm)
	501	A8NWB3	Brugia malayi (Filarial nematode worm)
	502	A8NQ63	Brugia malayi (Filarial nematode worm)
	503	A8NEL2	Brugia malayi (Filarial nematode worm)
	504	A8PA77	Brugia malayi (Filarial nematode worm)
	505	A8QH94	Brugia malayi (Filarial nematode worm)
	506	A8NJG2	Brugia malayi (Filarial nematode worm)
	507	A8PZX3	Brugia malayi (Filarial nematode worm)
	508	A8PHT6	Brugia malayi (Filarial nematode worm)
	509	A8NG52	Brugia malayi (Filarial nematode worm)
	510	A8PZJ6	Brugia malayi (Filarial nematode worm)
	511	A8QCK7	Brugia malayi (Filarial nematode worm)
	512	A8NVV0	Brugia malayi (Filarial nematode worm)
	513	A8NUR3	Brugia malayi (Filarial nematode worm)
	514	A8QC22	Brugia malayi (Filarial nematode worm)
	515	A8PJA7	Brugia malayi (Filarial nematode worm)
	516	A8NS79	Brugia malayi (Filarial nematode worm)
	517	A8NQD1	Brugia malayi (Filarial nematode worm)
	518	A8P035	Brugia malayi (Filarial nematode worm)
	519	A8QEG5	Brugia malayi (Filarial nematode worm)
	520	A8PQL4	Brugia malayi (Filarial nematode worm)
	521	A8P1I4	Brugia malayi (Filarial nematode worm)
	522	A8Q165	Brugia malayi (Filarial nematode worm)
	523	A8NDN0	Brugia malayi (Filarial nematode worm)
	524	A8Q032	Brugia malayi (Filarial nematode worm)
	525	A8PJ88	Brugia malayi (Filarial nematode worm)
	526	A8NL80	Brugia malayi (Filarial nematode worm)
	527	A8PV72	Brugia malayi (Filarial nematode worm)
	528	A8PJK8	Brugia malayi (Filarial nematode worm)
	529	A8PJG6	Brugia malayi (Filarial nematode worm)
	530	A8P4N7	Brugia malayi (Filarial nematode worm)
	531	A8QCL0	Brugia malayi (Filarial nematode worm)
	532	A8PD45	Brugia malayi (Filarial nematode worm)
	533	A8Q725	Brugia malayi (Filarial nematode worm)
	534	A8NIM3	Brugia malayi (Filarial nematode worm)
	535	A8NNC6	Brugia malayi (Filarial nematode worm)
	536	A8QBK2	Brugia malayi (Filarial nematode worm)
	537	A8NI46	Brugia malayi (Filarial nematode worm)
	538	A8PZN7	Brugia malayi (Filarial nematode worm)
	539	A8P8N5	Brugia malayi (Filarial nematode worm)
	540	A8QC70	Brugia malayi (Filarial nematode worm)
	541	A8NDV6	Brugia malayi (Filarial nematode worm)
	542	A8NPQ6	Brugia malayi (Filarial nematode worm)
	543	A8QEC4	Brugia malayi (Filarial nematode worm)
	544	A8PE26	Brugia malayi (Filarial nematode worm)
	545	A8NME7	Brugia malayi (Filarial nematode worm)
	546	A8PVB3	Brugia malayi (Filarial nematode worm)
	547	A8QHT8	Brugia malayi (Filarial nematode worm)
	548	A8NX35	Brugia malayi (Filarial nematode worm)
	549	A8PPI3	Brugia malayi (Filarial nematode worm)
	550	A8NGP0	Brugia malayi (Filarial nematode worm)
	551	A8PJY3	Brugia malayi (Filarial nematode worm)
	552	A8NML9	Brugia malayi (Filarial nematode worm)
	553	A8NZ57	Brugia malayi (Filarial nematode worm)
	554	A8PHN0	Brugia malayi (Filarial nematode worm)
	555	A8NDW2	Brugia malayi (Filarial nematode worm)
	556	A8Q2Z7	Brugia malayi (Filarial nematode worm)
	557	A8NR26	Brugia malayi (Filarial nematode worm)
	558	A8NCR9	Brugia malayi (Filarial nematode worm)
	559	A8PJ14	Brugia malayi (Filarial nematode worm)
	560	A8PJ97	Brugia malayi (Filarial nematode worm)
	561	A8QF37	Brugia malayi (Filarial nematode worm)
	562	A8PYV9	Brugia malayi (Filarial nematode worm)
	563	A8Q2K1	Brugia malayi (Filarial nematode worm)
	564	A8NE79	Brugia malayi (Filarial nematode worm)
	565	A8PIL7	Brugia malayi (Filarial nematode worm)
	566	A8QF74	Brugia malayi (Filarial nematode worm)
	567	A8PJK2	Brugia malayi (Filarial nematode worm)
	568	A8NFH0	Brugia malayi (Filarial nematode worm)
	569	A8PJY1	Brugia malayi (Filarial nematode worm)
	570	A8PY15	Brugia malayi (Filarial nematode worm)
	571	A8PIG9	Brugia malayi (Filarial nematode worm)
	572	A8PQQ4	Brugia malayi (Filarial nematode worm)
	573	A8QEQ8	Brugia malayi (Filarial nematode worm)
	574	A8PXV0	Brugia malayi (Filarial nematode worm)
	575	A8QC03	Brugia malayi (Filarial nematode worm)
	576	A8P4J5	Brugia malayi (Filarial nematode worm)
	577	A8PI97	Brugia malayi (Filarial nematode worm)
	578	A8PRF6	Brugia malayi (Filarial nematode worm)
	579	A8PSZ9	Brugia malayi (Filarial nematode worm)
	580	A8QB49	Brugia malayi (Filarial nematode worm)
	581	A8QGQ9	Brugia malayi (Filarial nematode worm)
	582	A8P1H6	Brugia malayi (Filarial nematode worm)
	583	A8P737	Brugia malayi (Filarial nematode worm)
	584	Q6T8C4	Brugia malayi (Filarial nematode worm)
	585	A8P004	Brugia malayi (Filarial nematode worm)
	586	A8P0Q4	Brugia malayi (Filarial nematode worm)
	587	A8QFI4	Brugia malayi (Filarial nematode worm)
	588	A8Q1W9	Brugia malayi (Filarial nematode worm)
	589	A8Q1I7	Brugia malayi (Filarial nematode worm)
	590	A8PZ08	Brugia malayi (Filarial nematode worm)
	591	A8PSF0	Brugia malayi (Filarial nematode worm)
	592	A8PVC0	Brugia malayi (Filarial nematode worm)
	593	A8Q4D3	Brugia malayi (Filarial nematode worm)
	594	A8NLN7	Brugia malayi (Filarial nematode worm)
	595	A8Q1C4	Brugia malayi (Filarial nematode worm)
	596	A8NDQ9	Brugia malayi (Filarial nematode worm)
	597	A8PLY6	Brugia malayi (Filarial nematode worm)
	598	A8Q5X6	Brugia malayi (Filarial nematode worm)
	599	A8Q495	Brugia malayi (Filarial nematode worm)
	600	A8Q5I8	Brugia malayi (Filarial nematode worm)
	601	A8PDL0	Brugia malayi (Filarial nematode worm)
	602	A8Q9H4	Brugia malayi (Filarial nematode worm)
	603	A8PQ82	Brugia malayi (Filarial nematode worm)
	604	A8QF67	Brugia malayi (Filarial nematode worm)
	605	A8Q7C8	Brugia malayi (Filarial nematode worm)
	606	A8QHV2	Brugia malayi (Filarial nematode worm)
	607	A8PFR4	Brugia malayi (Filarial nematode worm)
	608	A8PNG9	Brugia malayi (Filarial nematode worm)
	609	A8Q993	Brugia malayi (Filarial nematode worm)
	610	A8Q405	Brugia malayi (Filarial nematode worm)
	611	A8Q0E2	Brugia malayi (Filarial nematode worm)
	612	A8NUK0	Brugia malayi (Filarial nematode worm)
	613	A8Q0M9	Brugia malayi (Filarial nematode worm)
	614	A8NNG8	Brugia malayi (Filarial nematode worm)
	615	A8Q3W3	Brugia malayi (Filarial nematode worm)
	616	A8Q523	Brugia malayi (Filarial nematode worm)
	617	A8Q0N7	Brugia malayi (Filarial nematode worm)
	618	A8PZZ9	Brugia malayi (Filarial nematode worm)
	619	A8NHA5	Brugia malayi (Filarial nematode worm)
	620	A8P5E1	Brugia malayi (Filarial nematode worm)
	621	A8Q5X7	Brugia malayi (Filarial nematode worm)
	622	A8P0Q6	Brugia malayi (Filarial nematode worm)
	623	A8P9T2	Brugia malayi (Filarial nematode worm)
	624	A8P8X6	Brugia malayi (Filarial nematode worm)
	625	A8QFX7	Brugia malayi (Filarial nematode worm)
	626	A8PJX5	Brugia malayi (Filarial nematode worm)
	627	A8NSS0	Brugia malayi (Filarial nematode worm)
	628	A8PTL0	Brugia malayi (Filarial nematode worm)
	629	A8PJ50	Brugia malayi (Filarial nematode worm)
	630	A8PIF6	Brugia malayi (Filarial nematode worm)
	631	A8PK33	Brugia malayi (Filarial nematode worm)
	632	A8Q7G0	Brugia malayi (Filarial nematode worm)
	633	A8PPV9	Brugia malayi (Filarial nematode worm)
	634	A8QBL9	Brugia malayi (Filarial nematode worm)
	635	A8NDF0	Brugia malayi (Filarial nematode worm)
	636	A8Q7B6	Brugia malayi (Filarial nematode worm)
	637	A8P072	Brugia malayi (Filarial nematode worm)
	638	A8Q0X6	Brugia malayi (Filarial nematode worm)
	639	A8P222	Brugia malayi (Filarial nematode worm)
	640	Q0GGV6	Brugia malayi (Filarial nematode worm)
	641	A8PVA2	Brugia malayi (Filarial nematode worm)
	642	A8PTR9	Brugia malayi (Filarial nematode worm)
	643	A8PFB9	Brugia malayi (Filarial nematode worm)
	644	A8PVU3	Brugia malayi (Filarial nematode worm)
	645	A8PZ86	Brugia malayi (Filarial nematode worm)
	646	A8Q5Z2	Brugia malayi (Filarial nematode worm)
	647	A8P4S8	Brugia malayi (Filarial nematode worm)
	648	A8QG27	Brugia malayi (Filarial nematode worm)
	649	A8NWA3	Brugia malayi (Filarial nematode worm)
	650	A8PJ99	Brugia malayi (Filarial nematode worm)
	651	A8PV46	Brugia malayi (Filarial nematode worm)
	652	A8QDW2	Brugia malayi (Filarial nematode worm)
	653	A8P232	Brugia malayi (Filarial nematode worm)
	654	A8Q5D9	Brugia malayi (Filarial nematode worm)
	655	A8NHQ1	Brugia malayi (Filarial nematode worm)
	656	A8Q3U9	Brugia malayi (Filarial nematode worm)
	657	A8QBK6	Brugia malayi (Filarial nematode worm)
	658	A8QCW2	Brugia malayi (Filarial nematode worm)
	659	A8QHE3	Brugia malayi (Filarial nematode worm)
	660	A8PDA9	Brugia malayi (Filarial nematode worm)
	661	A8QBM4	Brugia malayi (Filarial nematode worm)
	662	A8PKN1	Brugia malayi (Filarial nematode worm)
	663	A8PLY1	Brugia malayi (Filarial nematode worm)
	664	A8QHF4	Brugia malayi (Filarial nematode worm)
	665	A8PJ95	Brugia malayi (Filarial nematode worm)
	666	A8NZT4	Brugia malayi (Filarial nematode worm)
	667	A8Q0B1	Brugia malayi (Filarial nematode worm)
	668	A8QEP1	Brugia malayi (Filarial nematode worm)
	669	A8PYQ9	Brugia malayi (Filarial nematode worm)
	670	A8PI21	Brugia malayi (Filarial nematode worm)
	671	A8PJ71	Brugia malayi (Filarial nematode worm)
	672	A8PCD4	Brugia malayi (Filarial nematode worm)
	673	A8Q4H5	Brugia malayi (Filarial nematode worm)
	674	A8PI99	Brugia malayi (Filarial nematode worm)
	675	A8QEW0	Brugia malayi (Filarial nematode worm)
	676	A8Q012	Brugia malayi (Filarial nematode worm)
	677	A8Q151	Brugia malayi (Filarial nematode worm)
	678	A8NMF1	Brugia malayi (Filarial nematode worm)
	679	A8PZI3	Brugia malayi (Filarial nematode worm)
	680	A8PQL3	Brugia malayi (Filarial nematode worm)
	681	A8QBE4	Brugia malayi (Filarial nematode worm)
	682	A8QHB2	Brugia malayi (Filarial nematode worm)
	683	A8Q981	Brugia malayi (Filarial nematode worm)
	684	A8NU34	Brugia malayi (Filarial nematode worm)
	685	A8QEN2	Brugia malayi (Filarial nematode worm)
	686	A8NVE8	Brugia malayi (Filarial nematode worm)
	687	A8P461	Brugia malayi (Filarial nematode worm)
	688	A8PYZ6	Brugia malayi (Filarial nematode worm)
	689	A8PCU9	Brugia malayi (Filarial nematode worm)
	690	A8PGH4	Brugia malayi (Filarial nematode worm)
	691	A8Q047	Brugia malayi (Filarial nematode worm)
	692	A8PY01	Brugia malayi (Filarial nematode worm)
	693	A8PZ95	Brugia malayi (Filarial nematode worm)
	694	A8Q7J8	Brugia malayi (Filarial nematode worm)
	695	A8QF35	Brugia malayi (Filarial nematode worm)
	696	A8Q2E1	Brugia malayi (Filarial nematode worm)
	697	A8Q7A8	Brugia malayi (Filarial nematode worm)
	698	A8PJI5	Brugia malayi (Filarial nematode worm)
	699	A8Q3Q9	Brugia malayi (Filarial nematode worm)
	700	A8Q9L7	Brugia malayi (Filarial nematode worm)
	701	A8P845	Brugia malayi (Filarial nematode worm)
	702	A8NU08	Brugia malayi (Filarial nematode worm)
	703	A8P228	Brugia malayi (Filarial nematode worm)
	704	A8PJ51	Brugia malayi (Filarial nematode worm)
	705	A8P4N2	Brugia malayi (Filarial nematode worm)
	706	A8Q0L6	Brugia malayi (Filarial nematode worm)
	707	A8QGF1	Brugia malayi (Filarial nematode worm)
	708	A8PTH1	Brugia malayi (Filarial nematode worm)
	709	A8NNG9	Brugia malayi (Filarial nematode worm)
	710	A8NYL1	Brugia malayi (Filarial nematode worm)
	711	Q17181	Brugia malayi (Filarial nematode worm)
	712	A8NG73	Brugia malayi (Filarial nematode worm)
	713	A8P8E0	Brugia malayi (Filarial nematode worm)
	714	A8PIB9	Brugia malayi (Filarial nematode worm)
	715	A8P681	Brugia malayi (Filarial nematode worm)
	716	Q8HN46	Brugia malayi (Filarial nematode worm)
	717	A8P793	Brugia malayi (Filarial nematode worm)
	718	Q5I4E2	Brugia malayi (Filarial nematode worm)
	719	A8P6I2	Brugia malayi (Filarial nematode worm)
	720	A8QHK3	Brugia malayi (Filarial nematode worm)
	721	A8P9K2	Brugia malayi (Filarial nematode worm)
	722	A8PXH7	Brugia malayi (Filarial nematode worm)
	723	A8QAQ8	Brugia malayi (Filarial nematode worm)
	724	A8PTW6	Brugia malayi (Filarial nematode worm)
	725	A8Q167	Brugia malayi (Filarial nematode worm)
	726	A8Q3W0	Brugia malayi (Filarial nematode worm)
	727	A8PPR6	Brugia malayi (Filarial nematode worm)
	728	Q17173	Brugia malayi (Filarial nematode worm)
	729	B5B7R4	Schistosoma japonicum (Blood fluke)
	730	Q5BWZ1	Schistosoma japonicum (Blood fluke)
	731	C1LAP3	Schistosoma japonicum (Blood fluke)
	732	C7TXT0	Schistosoma japonicum (Blood fluke)
	733	C1LPB0	Schistosoma japonicum (Blood fluke)
	734	C1LXX5	Schistosoma japonicum (Blood fluke)
	735	Q5BYV3	Schistosoma japonicum (Blood fluke)
	736	C1LAP4	Schistosoma japonicum (Blood fluke)
	737	C1LAN8	Schistosoma japonicum (Blood fluke)
	738	Q5BWE2	Schistosoma japonicum (Blood fluke)
	739	Q5C239	Schistosoma japonicum (Blood fluke)
	740	C1LAQ6	Schistosoma japonicum (Blood fluke)
	741	C1LAP8	Schistosoma japonicum (Blood fluke)
	742	C1L8R5	Schistosoma japonicum (Blood fluke)
	743	Q5BYL9	Schistosoma japonicum (Blood fluke)
	744	C1LAN9	Schistosoma japonicum (Blood fluke)
	745	Q86F72	Schistosoma japonicum (Blood fluke)
	746	C7DT90	Schistosoma japonicum (Blood fluke)
	747	Q5BZ83	Schistosoma japonicum (Blood fluke)
	748	C1LAP7	Schistosoma japonicum (Blood fluke)
	749	C1LXX7	Schistosoma japonicum (Blood fluke)
	750	Q5BS71	Schistosoma japonicum (Blood fluke)
	751	C1LAP9	Schistosoma japonicum (Blood fluke)
	752	Q5BS14	Schistosoma japonicum (Blood fluke)
	753	Q5DA95	Schistosoma japonicum (Blood fluke)
	754	C1LLW6	Schistosoma japonicum (Blood fluke)
	755	Q5D9C5	Schistosoma japonicum (Blood fluke)
	756	Q5DBU7	Schistosoma japonicum (Blood fluke)
	757	Q5DCC1	Schistosoma japonicum (Blood fluke)
	758	Q5DCQ9	Schistosoma japonicum (Blood fluke)
	759	Q5DH80	Schistosoma japonicum (Blood fluke)
	760	Q5BSQ8	Schistosoma japonicum (Blood fluke)
	761	Q5C240	Schistosoma japonicum (Blood fluke)
	762	Q5C1Z7	Schistosoma japonicum (Blood fluke)
	763	Q5DA33	Schistosoma japonicum (Blood fluke)
	764	Q86F47	Schistosoma japonicum (Blood fluke)
	765	Q5DHV2	Schistosoma japonicum (Blood fluke)
	766	C1LU54	Schistosoma japonicum (Blood fluke)
	767	C1LF82	Schistosoma japonicum (Blood fluke)
	768	C1LFC4	Schistosoma japonicum (Blood fluke)
	769	C1L4J4	Schistosoma japonicum (Blood fluke)
	770	C1LQ31	Schistosoma japonicum (Blood fluke)
	771	D2SY04	Schistosoma japonicum (Blood fluke)
	772	D2SY05	Schistosoma japonicum (Blood fluke)
	773	Q5DHQ3	Schistosoma japonicum (Blood fluke)
	774	Q5BX40	Schistosoma japonicum (Blood fluke)
	775	Q5BXG1	Schistosoma japonicum (Blood fluke)
	776	Q5DB43	Schistosoma japonicum (Blood fluke)
	777	Q5C3T8	Schistosoma japonicum (Blood fluke)
	778	C1LDU3	Schistosoma japonicum (Blood fluke)
	779	Q5C4I8	Schistosoma japonicum (Blood fluke)
	780	Q5C3Z6	Schistosoma japonicum (Blood fluke)
	781	C1LQQ8	Schistosoma japonicum (Blood fluke)
	782	Q5DG54	Schistosoma japonicum (Blood fluke)
	783	Q5DHM1	Schistosoma japonicum (Blood fluke)
	784	C1LU50	Schistosoma japonicum (Blood fluke)
	785	C1L6D2	Schistosoma japonicum (Blood fluke)
	786	C1LQR0	Schistosoma japonicum (Blood fluke)
	787	Q3KZ83	Schistosoma japonicum (Blood fluke)
	788	C1L6D1	Schistosoma japonicum (Blood fluke)
	789	C1LIB8	Schistosoma japonicum (Blood fluke)
	790	Q5D960	Schistosoma japonicum (Blood fluke)
	791	Q5BXI6	Schistosoma japonicum (Blood fluke)
	792	Q5DFS7	Schistosoma japonicum (Blood fluke)
	793	Q5DEH1	Schistosoma japonicum (Blood fluke)
	794	Q5C2A0	Schistosoma japonicum (Blood fluke)
	795	Q5DEF0	Schistosoma japonicum (Blood fluke)
	796	Q5BY31	Schistosoma japonicum (Blood fluke)
	797	Q5BWB0	Schistosoma japonicum (Blood fluke)
	798	B5B7R3	Schistosoma japonicum (Blood fluke)
	799	Q5C327	Schistosoma japonicum (Blood fluke)
	800	C1LAW4	Schistosoma japonicum (Blood fluke)
	801	C7DT89	Schistosoma japonicum (Blood fluke)
	802	Q5C5V0	Schistosoma japonicum (Blood fluke)
	803	Q5C7K1	Schistosoma japonicum (Blood fluke)
	804	Q5DCS9	Schistosoma japonicum (Blood fluke)
	805	Q9U5I7	Schistosoma japonicum (Blood fluke)
	806	C1LXX8	Schistosoma japonicum (Blood fluke)
	807	Q5C071	Schistosoma japonicum (Blood fluke)
	808	C1LCG4	Schistosoma japonicum (Blood fluke)
	809	C1LHE2	Schistosoma japonicum (Blood fluke)
	810	C1LJC5	Schistosoma japonicum (Blood fluke)
	811	Q5BW73	Schistosoma japonicum (Blood fluke)
	812	C1L9A0	Schistosoma japonicum (Blood fluke)
	813	Q5C0S1	Schistosoma japonicum (Blood fluke)
	814	Q5C7U5	Schistosoma japonicum (Blood fluke)
	815	Q5BZD8	Schistosoma japonicum (Blood fluke)
	816	Q5DG30	Schistosoma japonicum (Blood fluke)
	817	C1LCN4	Schistosoma japonicum (Blood fluke)
	818	C4N150	Schistosoma japonicum (Blood fluke)
	819	Q5DH33	Schistosoma japonicum (Blood fluke)
	820	Q86FD7	Schistosoma japonicum (Blood fluke)
	821	C1L457	Schistosoma japonicum (Blood fluke)
	822	Q5BYH6	Schistosoma japonicum (Blood fluke)
	823	Q5BYJ0	Schistosoma japonicum (Blood fluke)
	824	Q5DER5	Schistosoma japonicum (Blood fluke)
	825	C1LG76	Schistosoma japonicum (Blood fluke)
	826	Q5C269	Schistosoma japonicum (Blood fluke)
	827	Q5DEH7	Schistosoma japonicum (Blood fluke)
	828	Q5BY44	Schistosoma japonicum (Blood fluke)
	829	Q5C767	Schistosoma japonicum (Blood fluke)
	830	Q5BZT9	Schistosoma japonicum (Blood fluke)
	831	Q5C0V6	Schistosoma japonicum (Blood fluke)
	832	C1LER2	Schistosoma japonicum (Blood fluke)
	833	G9B171	Schistosoma japonicum (Blood fluke)
	834	Q5DEQ6	Schistosoma japonicum (Blood fluke)
	835	Q5DFS8	Schistosoma japonicum (Blood fluke)
	836	G9B159	Schistosoma japonicum (Blood fluke)
	837	C1LGR0	Schistosoma japonicum (Blood fluke)
	838	Q5C0M5	Schistosoma japonicum (Blood fluke)
	839	Q5DAA4	Schistosoma japonicum (Blood fluke)
	840	Q5DAE2	Schistosoma japonicum (Blood fluke)
	841	C1LCR3	Schistosoma japonicum (Blood fluke)
	842	Q5C2C6	Schistosoma japonicum (Blood fluke)
	843	Q5C7Q0	Schistosoma japonicum (Blood fluke)
	844	Q5DED1	Schistosoma japonicum (Blood fluke)
	845	Q5BWQ3	Schistosoma japonicum (Blood fluke)
	846	D2SY03	Schistosoma japonicum (Blood fluke)
	847	Q5BYL0	Schistosoma japonicum (Blood fluke)
	848	C1L9A2	Schistosoma japonicum (Blood fluke)
	849	C1LCG9	Schistosoma japonicum (Blood fluke)
	850	C1LU52	Schistosoma japonicum (Blood fluke)
	851	Q5BWU0	Schistosoma japonicum (Blood fluke)
	852	C7TXT1	Schistosoma japonicum (Blood fluke)
	853	C1LGR1	Schistosoma japonicum (Blood fluke)
	854	C1LHV1	Schistosoma japonicum (Blood fluke)
	855	D2SY07	Schistosoma japonicum (Blood fluke)
	856	Q5BXB5	Schistosoma japonicum (Blood fluke)
	857	G9B0Z9	Schistosoma japonicum (Blood fluke)
	858	Q5DAA9	Schistosoma japonicum (Blood fluke)
	859	Q86E95	Schistosoma japonicum (Blood fluke)
	860	Q5C783	Schistosoma japonicum (Blood fluke)
	861	Q5C5N1	Schistosoma japonicum (Blood fluke)
	862	C7TYD8	Schistosoma japonicum (Blood fluke)
	863	Q86EQ2	Schistosoma japonicum (Blood fluke)
	864	Q5C738	Schistosoma japonicum (Blood fluke)
	865	Q3KZB1	Schistosoma japonicum (Blood fluke)
	866	Q5DCX1	Schistosoma japonicum (Blood fluke)
	867	Q5C1T9	Schistosoma japonicum (Blood fluke)
	868	C1L9A3	Schistosoma japonicum (Blood fluke)
	869	D2SY06	Schistosoma japonicum (Blood fluke)
	870	C1LQ29	Schistosoma japonicum (Blood fluke)
	871	Q5BXA1	Schistosoma japonicum (Blood fluke)
	872	C1LCM2	Schistosoma japonicum (Blood fluke)
	873	C1LQQ7	Schistosoma japonicum (Blood fluke)
	874	Q5BY99	Schistosoma japonicum (Blood fluke)
	875	Q5C2K5	Schistosoma japonicum (Blood fluke)
	876	C1L9A4	Schistosoma japonicum (Blood fluke)
	877	Q5C4Z2	Schistosoma japonicum (Blood fluke)
	878	Q5C0F4	Schistosoma japonicum (Blood fluke)
	879	Q5C2R9	Schistosoma japonicum (Blood fluke)
	880	C1L4M0	Schistosoma japonicum (Blood fluke)
	881	C1L5K9	Schistosoma japonicum (Blood fluke)
	882	Q5DGZ2	Schistosoma japonicum (Blood fluke)
	883	Q5BRY9	Schistosoma japonicum (Blood fluke)
	884	C1LAW5	Schistosoma japonicum (Blood fluke)
	885	Q5BWY6	Schistosoma japonicum (Blood fluke)
	886	C1LLW4	Schistosoma japonicum (Blood fluke)
	887	C7TXR4	Schistosoma japonicum (Blood fluke)
	888	Q5C229	Schistosoma japonicum (Blood fluke)
	889	Q5C7C7	Schistosoma japonicum (Blood fluke)
	890	C1L3R1	Schistosoma japonicum (Blood fluke)
	891	C1LQR7	Schistosoma japonicum (Blood fluke)
	892	C1LGT2	Schistosoma japonicum (Blood fluke)
	893	Q5BZ03	Schistosoma japonicum (Blood fluke)
	894	C1LFW8	Schistosoma japonicum (Blood fluke)
	895	Q5BZ78	Schistosoma japonicum (Blood fluke)
	896	Q5BWL1	Schistosoma japonicum (Blood fluke)
	897	Q5C4M2	Schistosoma japonicum (Blood fluke)
	898	Q5C2N1	Schistosoma japonicum (Blood fluke)
	899	Q5DI56	Schistosoma japonicum (Blood fluke)
	900	Q5C3H5	Schistosoma japonicum (Blood fluke)
	901	C1LQ28	Schistosoma japonicum (Blood fluke)
	902	Q5C5E0	Schistosoma japonicum (Blood fluke)
	903	D2SY08	Schistosoma japonicum (Blood fluke)
	904	C1LFG6	Schistosoma japonicum (Blood fluke)
	905	C1L537	Schistosoma japonicum (Blood fluke)
	906	D2SY09	Schistosoma japonicum (Blood fluke)
	907	C1LXV0	Schistosoma japonicum (Blood fluke)
	908	B8YGD6	Schistosoma japonicum (Blood fluke)
	909	Q5C096	Schistosoma japonicum (Blood fluke)
	910	C1LDV0	Schistosoma japonicum (Blood fluke)
	911	Q5DFB2	Schistosoma japonicum (Blood fluke)
	912	Q5BXN3	Schistosoma japonicum (Blood fluke)
	913	Q5BY00	Schistosoma japonicum (Blood fluke)
	914	C1LQR4	Schistosoma japonicum (Blood fluke)
	915	C1LU55	Schistosoma japonicum (Blood fluke)
	916	Q5D9N0	Schistosoma japonicum (Blood fluke)
	917	Q86EL8	Schistosoma japonicum (Blood fluke)
	918	Q5BVG7	Schistosoma japonicum (Blood fluke)
	919	Q5DBX8	Schistosoma japonicum (Blood fluke)
	920	C1LFK0	Schistosoma japonicum (Blood fluke)
	921	Q5DB65	Schistosoma japonicum (Blood fluke)
	922	C1L6A8	Schistosoma japonicum (Blood fluke)
	923	C1LJ86	Schistosoma japonicum (Blood fluke)
	924	Q5DI11	Schistosoma japonicum (Blood fluke)
	925	Q5C4X4	Schistosoma japonicum (Blood fluke)
	926	C1LCG8	Schistosoma japonicum (Blood fluke)
	927	Q5DBS4	Schistosoma japonicum (Blood fluke)
	928	Q5DFQ4	Schistosoma japonicum (Blood fluke)
	929	Q5BYQ3	Schistosoma japonicum (Blood fluke)
	930	C1L6D3	Schistosoma japonicum (Blood fluke)
	931	C1LXV5	Schistosoma japonicum (Blood fluke)
	932	C7TXZ5	Schistosoma japonicum (Blood fluke)
	933	C1LCM1	Schistosoma japonicum (Blood fluke)
	934	C1LQQ9	Schistosoma japonicum (Blood fluke)
	935	Q5BZN9	Schistosoma japonicum (Blood fluke)
	936	Q5BXF1	Schistosoma japonicum (Blood fluke)
	937	Q5C7J1	Schistosoma japonicum (Blood fluke)
	938	Q5D8U8	Schistosoma japonicum (Blood fluke)
	939	C1LF61	Schistosoma japonicum (Blood fluke)
	940	C1L8W1	Schistosoma japonicum (Blood fluke)
	941	C1LPA8	Schistosoma japonicum (Blood fluke)
	942	Q9Y197	Dermatophagoides pteronyssinus (European house dust mite)
	943	A1KXI2	Blomia tropicalis (Mite)
	944	Q1M2P3	Blomia tropicalis (Mite)
	945	B0FRE2	Dermatophagoides pteronyssinus (European house dust mite)
	946	Q1M2P2	Blomia tropicalis (Mite)
	947	Q1H8P8	Dermatophagoides pteronyssinus (European house dust mite)
	948	A6XEP3	Blomia tropicalis (Mite)
	949	A6XEP6	Blomia tropicalis (Mite)
	950	A6XEP9	Dermatophagoides pteronyssinus (European house dust mite)
	951	A6XEP1	Blomia tropicalis (Mite)
	952	A6XEP0	Blomia tropicalis (Mite)
	953	A6XEP2	Blomia tropicalis (Mite)
	954	A6XEP5	Blomia tropicalis (Mite)
	955	Q1M2P1	Blomia tropicalis (Mite)
	956	A6XEP4	Blomia tropicalis (Mite)
	957	A1KXI9	Blomia tropicalis (Mite)
	958	A6XEN9	Blomia tropicalis (Mite)
	959	C7T6L5	Dermatophagoides pteronyssinus (European house dust mite)
	960	A6XEN8	Blomia tropicalis (Mite)
	961	I2CMD7	Dermatophagoides pteronyssinus (European house dust mite)
	962	I2CMD4	Dermatophagoides pteronyssinus (European house dust mite)
	963	Q9GNW4	Mansonella ozzardi
	964	Q9GNX0	Mansonella ozzardi
	965	Q9GNW6	Mansonella ozzardi
	966	Q9GNW7	Mansonella ozzardi
	967	Q1M2P0	Lepidoglyphus destructor (Fodder mite)
	968	Q1M2N6	Lepidoglyphus destructor (Fodder mite)
	969	Q1M2N7	Lepidoglyphus destructor (Fodder mite)
	970	Q1M2N5	Lepidoglyphus destructor (Fodder mite)
	971	Q9GNW8	Mansonella ozzardi
	972	Q1M2N8	Lepidoglyphus destructor (Fodder mite)
	973	Q1M2N2	Lepidoglyphus destructor (Fodder mite)
	974	Q1M2N4	Lepidoglyphus destructor (Fodder mite)
	975	Q9GNX1	Mansonella ozzardi
	976	Q9GNW9	Mansonella ozzardi
	977	Q9GNW5	Mansonella ozzardi
	978	D3IZV3	Anisakis simplex (Herring worm)
	979	D2KXC6	Anisakis simplex (Herring worm)
	980	F5BYV8	Anisakis simplex (Herring worm)
	981	F5BYT9	Anisakis simplex (Herring worm)
	982	F5BYT5	Anisakis simplex (Herring worm)
	983	I3RLK1	Anisakis simplex (Herring worm)
	984	I3RLK2	Anisakis simplex (Herring worm)
	985	F5BYT3	Anisakis simplex (Herring worm)
	986	F5BYV5	Anisakis simplex (Herring worm)
	987	F5BYV7	Anisakis simplex (Herring worm)
	988	Q1X6K6	Anisakis simplex (Herring worm)
	989	Q9TA74	Anisakis simplex (Herring worm)
	990	Q9Y196	Euroglyphus maynei (Mayne's house dust mite)
	991	Q9GNW0	Onchocerca volvulus
	992	O46147	Onchocerca volvulus
	993	Q9GNV8	Onchocerca volvulus
	994	Q25616	Onchocerca volvulus
	995	O47580	Onchocerca volvulus
	996	Q9GNW1	Onchocerca volvulus
	997	Q9GNW2	Onchocerca volvulus
	998	Q8HH88	Sarcoptes scabiei type hominis
	999	Q2VXY3	Aleuroglyphus ovatus (brown legged grain mite)
	1000	A7XZH4	Aleuroglyphus ovatus (brown legged grain mite)
	1001	B0KZL5	Tyrophagus putrescentiae (Dust mite)
	1002	A7XZL0	Tyrophagus putrescentiae (Dust mite)
	1003	A7XZK8	Tyrophagus putrescentiae (Dust mite)
	1004	E7BBC2	Schistosoma mansoni (Blood fluke)
	1005	G4VS36	Schistosoma mansoni (Blood fluke)
	1006	G4VGM7	Schistosoma mansoni (Blood fluke)
	1007	G4VGJ9	Schistosoma mansoni (Blood fluke)
	1008	G4VNH7	Schistosoma mansoni (Blood fluke)
	1009	G4VH26	Schistosoma mansoni (Blood fluke)
	1010	G4VH60	Schistosoma mansoni (Blood fluke)
	1011	G4VKP3	Schistosoma mansoni (Blood fluke)
	1012	G4VEK9	Schistosoma mansoni (Blood fluke)
	1013	G4VPA1	Schistosoma mansoni (Blood fluke)
	1014	G4VPA5	Schistosoma mansoni (Blood fluke)
	1015	G4LWK7	Schistosoma mansoni (Blood fluke)
	1016	G4LY71	Schistosoma mansoni (Blood fluke)
	1017	G4M0C9	Schistosoma mansoni (Blood fluke)
	1018	G4LXJ8	Schistosoma mansoni (Blood fluke)
	1019	G4LZR2	Schistosoma mansoni (Blood fluke)
	1020	G4V6C4	Schistosoma mansoni (Blood fluke)
	1021	G4LXW9	Schistosoma mansoni (Blood fluke)
	1022	G4V7W4	Schistosoma mansoni (Blood fluke)
	1023	G4VD41	Schistosoma mansoni (Blood fluke)
	1024	G4VDC4	Schistosoma mansoni (Blood fluke)
	1025	G4VBY9	Schistosoma mansoni (Blood fluke)
	1026	G4VC60	Schistosoma mansoni (Blood fluke)
	1027	G4LYM1	Schistosoma mansoni (Blood fluke)
	1028	G4V824	Schistosoma mansoni (Blood fluke)
	1029	G4V7F8	Schistosoma mansoni (Blood fluke)
	1030	G4VFG4	Schistosoma mansoni (Blood fluke)
	1031	G4VES6	Schistosoma mansoni (Blood fluke)
	1032	G4VRS3	Schistosoma mansoni (Blood fluke)
	1033	G4VTB2	Schistosoma mansoni (Blood fluke)
	1034	G4V755	Schistosoma mansoni (Blood fluke)
	1035	G4VFZ8	Schistosoma mansoni (Blood fluke)
	1036	G4M1I1	Schistosoma mansoni (Blood fluke)
	1037	G4LXY3	Schistosoma mansoni (Blood fluke)
	1038	G4M253	Schistosoma mansoni (Blood fluke)
	1039	G4V5I5	Schistosoma mansoni (Blood fluke)
	1040	G4VDN1	Schistosoma mansoni (Blood fluke)
	1041	G4V8I5	Schistosoma mansoni (Blood fluke)
	1042	G4V8R3	Schistosoma mansoni (Blood fluke)
	1043	G4V7F7	Schistosoma mansoni (Blood fluke)
	1044	G4VS12	Schistosoma mansoni (Blood fluke)
	1045	G4VM95	Schistosoma mansoni (Blood fluke)
	1046	G4VI98	Schistosoma mansoni (Blood fluke)
	1047	G4VR12	Schistosoma mansoni (Blood fluke)
	1048	G4VQ37	Schistosoma mansoni (Blood fluke)
	1049	G4VQW0	Schistosoma mansoni (Blood fluke)
	1050	G4LVE3	Schistosoma mansoni (Blood fluke)
	1051	G4VD39	Schistosoma mansoni (Blood fluke)
	1052	G4VPA3	Schistosoma mansoni (Blood fluke)
	1053	G4LY70	Schistosoma mansoni (Blood fluke)
	1054	G4LYL1	Schistosoma mansoni (Blood fluke)
	1055	G4LYA2	Schistosoma mansoni (Blood fluke)
	1056	G4V8R2	Schistosoma mansoni (Blood fluke)
	1057	G4LZI7	Schistosoma mansoni (Blood fluke)
	1058	G4VDR1	Schistosoma mansoni (Blood fluke)
	1059	G4V5K5	Schistosoma mansoni (Blood fluke)
	1060	G4VG66	Schistosoma mansoni (Blood fluke)
	1061	G4LY24	Schistosoma mansoni (Blood fluke)
	1062	G4VHE6	Schistosoma mansoni (Blood fluke)
	1063	G4VMX8	Schistosoma mansoni (Blood fluke)
	1064	G4VQ41	Schistosoma mansoni (Blood fluke)
	1065	G4VQY1	Schistosoma mansoni (Blood fluke)
	1066	G4VRL8	Schistosoma mansoni (Blood fluke)
	1067	G4VH62	Schistosoma mansoni (Blood fluke)
	1068	G4VC64	Schistosoma mansoni (Blood fluke)
	1069	G4VLE1	Schistosoma mansoni (Blood fluke)
	1070	G4M0P7	Schistosoma mansoni (Blood fluke)
	1071	G4M1L1	Schistosoma mansoni (Blood fluke)
	1072	G4VIS6	Schistosoma mansoni (Blood fluke)
	1073	G4LZU7	Schistosoma mansoni (Blood fluke)
	1074	G4V6G3	Schistosoma mansoni (Blood fluke)
	1075	G4VTX4	Schistosoma mansoni (Blood fluke)
	1076	G4V8X9	Schistosoma mansoni (Blood fluke)
	1077	G4VCF9	Schistosoma mansoni (Blood fluke)
	1078	G4VH99	Schistosoma mansoni (Blood fluke)
	1079	G4LY41	Schistosoma mansoni (Blood fluke)
	1080	G4LXK1	Schistosoma mansoni (Blood fluke)
	1081	G4V6G9	Schistosoma mansoni (Blood fluke)
	1082	G4VS11	Schistosoma mansoni (Blood fluke)
	1083	G4LWC2	Schistosoma mansoni (Blood fluke)
	1084	G4VCK6	Schistosoma mansoni (Blood fluke)
	1085	G4LY69	Schistosoma mansoni (Blood fluke)
	1086	G4V8S4	Schistosoma mansoni (Blood fluke)
	1087	G4VHE5	Schistosoma mansoni (Blood fluke)
	1088	G4VSQ3	Schistosoma mansoni (Blood fluke)
	1089	G4VN88	Schistosoma mansoni (Blood fluke)
	1090	G4VG60	Schistosoma mansoni (Blood fluke)
	1091	G4VHE2	Schistosoma mansoni (Blood fluke)
	1092	G4LXK0	Schistosoma mansoni (Blood fluke)
	1093	G4VIL6	Schistosoma mansoni (Blood fluke)
	1094	G4VHC1	Schistosoma mansoni (Blood fluke)
	1095	G4VCK5	Schistosoma mansoni (Blood fluke)
	1096	G4VBR3	Schistosoma mansoni (Blood fluke)
	1097	G4VPH6	Schistosoma mansoni (Blood fluke)
	1098	G4V8F1	Schistosoma mansoni (Blood fluke)
	1099	G4V5N0	Schistosoma mansoni (Blood fluke)
	1100	G4V9E1	Schistosoma mansoni (Blood fluke)
	1101	G4VD40	Schistosoma mansoni (Blood fluke)
	1102	G4VTL1	Schistosoma mansoni (Blood fluke)
	1103	G4VG34	Schistosoma mansoni (Blood fluke)
	1104	G4V5E9	Schistosoma mansoni (Blood fluke)
	1105	G4VBK4	Schistosoma mansoni (Blood fluke)
	1106	G4VGD8	Schistosoma mansoni (Blood fluke)
	1107	G4VNR9	Schistosoma mansoni (Blood fluke)
	1108	G4VL44	Schistosoma mansoni (Blood fluke)
	1109	G4V5Z5	Schistosoma mansoni (Blood fluke)
	1110	G4V918	Schistosoma mansoni (Blood fluke)
	1111	G4VKN9	Schistosoma mansoni (Blood fluke)
	1112	G4V8L8	Schistosoma mansoni (Blood fluke)
	1113	G4VIB1	Schistosoma mansoni (Blood fluke)
	1114	G4VMW2	Schistosoma mansoni (Blood fluke)
	1115	G4VKP5	Schistosoma mansoni (Blood fluke)
	1116	G4LVZ1	Schistosoma mansoni (Blood fluke)
	1117	G4VKW1	Schistosoma mansoni (Blood fluke)
	1118	G4VMW9	Schistosoma mansoni (Blood fluke)
	1119	C4QII1	Schistosoma mansoni (Blood fluke)
	1120	G4VH96	Schistosoma mansoni (Blood fluke)
	1121	G4VKN8	Schistosoma mansoni (Blood fluke)
	1122	G4VRE5	Schistosoma mansoni (Blood fluke)
	1123	G4LYV3	Schistosoma mansoni (Blood fluke)
	1124	G4VDY5	Schistosoma mansoni (Blood fluke)
	1125	G4VIS5	Schistosoma mansoni (Blood fluke)
	1126	G4VNH6	Schistosoma mansoni (Blood fluke)
	1127	G4VP76	Schistosoma mansoni (Blood fluke)
	1128	G4VBR4	Schistosoma mansoni (Blood fluke)
	1129	G4VKN7	Schistosoma mansoni (Blood fluke)
	1130	G4M0N2	Schistosoma mansoni (Blood fluke)
	1131	G4VB20	Schistosoma mansoni (Blood fluke)
	1132	G4VPR4	Schistosoma mansoni (Blood fluke)
	1133	G4V693	Schistosoma mansoni (Blood fluke)
	1134	G4V5Y5	Schistosoma mansoni (Blood fluke)
	1135	G4VSU9	Schistosoma mansoni (Blood fluke)
	1136	G4VAQ1	Schistosoma mansoni (Blood fluke)
	1137	G4VTH6	Schistosoma mansoni (Blood fluke)
	1138	G4VH31	Schistosoma mansoni (Blood fluke)
	1139	G4VTR7	Schistosoma mansoni (Blood fluke)
	1140	C1M031	Schistosoma mansoni (Blood fluke)
	1141	G4VKP0	Schistosoma mansoni (Blood fluke)
	1142	G4V612	Schistosoma mansoni (Blood fluke)
	1143	G4VH17	Schistosoma mansoni (Blood fluke)
	1144	G4VFR4	Schistosoma mansoni (Blood fluke)
	1145	G4VJU1	Schistosoma mansoni (Blood fluke)
	1146	G4VMC3	Schistosoma mansoni (Blood fluke)
	1147	G4LXB3	Schistosoma mansoni (Blood fluke)
	1148	G4VAR4	Schistosoma mansoni (Blood fluke)
	1149	G4VNV6	Schistosoma mansoni (Blood fluke)
	1150	G4VH61	Schistosoma mansoni (Blood fluke)
	1151	G4VHT4	Schistosoma mansoni (Blood fluke)
	1152	G4V7F9	Schistosoma mansoni (Blood fluke)
	1153	G4VP56	Schistosoma mansoni (Blood fluke)
	1154	G4LZT7	Schistosoma mansoni (Blood fluke)
	1155	G4VB17	Schistosoma mansoni (Blood fluke)
	1156	G4VH83	Schistosoma mansoni (Blood fluke)
	1157	G4V8Y6	Schistosoma mansoni (Blood fluke)
	1158	G4VEJ9	Schistosoma mansoni (Blood fluke)
	1159	G4V8X8	Schistosoma mansoni (Blood fluke)
	1160	G4VD70	Schistosoma mansoni (Blood fluke)
	1161	G4VF39	Schistosoma mansoni (Blood fluke)
	1162	G4VHX0	Schistosoma mansoni (Blood fluke)
	1163	G4VJU2	Schistosoma mansoni (Blood fluke)
	1164	G4LWU1	Schistosoma mansoni (Blood fluke)
	1165	G4V6J3	Schistosoma mansoni (Blood fluke)
	1166	G4V8Y3	Schistosoma mansoni (Blood fluke)
	1167	G4VJA7	Schistosoma mansoni (Blood fluke)
	1168	G4VIS2	Schistosoma mansoni (Blood fluke)
	1169	G4VMC5	Schistosoma mansoni (Blood fluke)
	1170	G4LVP9	Schistosoma mansoni (Blood fluke)
	1171	G4V863	Schistosoma mansoni (Blood fluke)
	1172	G4VB94	Schistosoma mansoni (Blood fluke)
	1173	G4VKP2	Schistosoma mansoni (Blood fluke)
	1174	G4VB72	Schistosoma mansoni (Blood fluke)
	1175	G4VTL2	Schistosoma mansoni (Blood fluke)
	1176	G4M1K5	Schistosoma mansoni (Blood fluke)
	1177	G4VFZ7	Schistosoma mansoni (Blood fluke)
	1178	G4VIL4	Schistosoma mansoni (Blood fluke)
	1179	G4LY42	Schistosoma mansoni (Blood fluke)
	1180	G4LZT5	Schistosoma mansoni (Blood fluke)
	1181	G4VKP4	Schistosoma mansoni (Blood fluke)
	1182	G4VN79	Schistosoma mansoni (Blood fluke)
	1183	G4M0P6	Schistosoma mansoni (Blood fluke)
	1184	G4V9M4	Schistosoma mansoni (Blood fluke)
	1185	G4VEK8	Schistosoma mansoni (Blood fluke)
	1186	G4VKB2	Schistosoma mansoni (Blood fluke)
	1187	G4VKP7	Schistosoma mansoni (Blood fluke)
	1188	G4VR92	Schistosoma mansoni (Blood fluke)
	1189	G4V5Y7	Schistosoma mansoni (Blood fluke)
	1190	G4VEX8	Schistosoma mansoni (Blood fluke)
	1191	G4V6C3	Schistosoma mansoni (Blood fluke)
	1192	G4V966	Schistosoma mansoni (Blood fluke)
	1193	G4M0D0	Schistosoma mansoni (Blood fluke)
	1194	G4VJ14	Schistosoma mansoni (Blood fluke)
	1195	G4M054	Schistosoma mansoni (Blood fluke)
	1196	G4VE95	Schistosoma mansoni (Blood fluke)
	1197	G4VGD4	Schistosoma mansoni (Blood fluke)
	1198	G4V8A1	Schistosoma mansoni (Blood fluke)
	1199	G4V8Y4	Schistosoma mansoni (Blood fluke)
	1200	G4VB40	Schistosoma mansoni (Blood fluke)
	1201	G4LYW0	Schistosoma mansoni (Blood fluke)
	1202	G4VAD9	Schistosoma mansoni (Blood fluke)
	1203	G4LWC6	Schistosoma mansoni (Blood fluke)
	1204	G4VKP1	Schistosoma mansoni (Blood fluke)
	1205	G4VPA4	Schistosoma mansoni (Blood fluke)
	1206	G4VI17	Schistosoma mansoni (Blood fluke)
	1207	G4LYG7	Schistosoma mansoni (Blood fluke)
	1208	G4VPH7	Schistosoma mansoni (Blood fluke)
	1209	G4VID6	Schistosoma mansoni (Blood fluke)
	1210	G4VK99	Schistosoma mansoni (Blood fluke)
	1211	G4VHZ5	Schistosoma mansoni (Blood fluke)
	1212	G4VE01	Schistosoma mansoni (Blood fluke)
	1213	G4VKW0	Schistosoma mansoni (Blood fluke)
	1214	G4VSS4	Schistosoma mansoni (Blood fluke)
	1215	G4LZR3	Schistosoma mansoni (Blood fluke)
	1216	G4M023	Schistosoma mansoni (Blood fluke)
	1217	Q6S8B5	Schistosoma mansoni (Blood fluke)
	1218	Q4L0H7	Schistosoma mansoni (Blood fluke)
	1219	G4V5U5	Schistosoma mansoni (Blood fluke)
	1220	G4V9F1	Schistosoma mansoni (Blood fluke)
	1221	G4VB76	Schistosoma mansoni (Blood fluke)
	1222	G4VK05	Schistosoma mansoni (Blood fluke)
	1223	G4VJZ3	Schistosoma mansoni (Blood fluke)
	1224	G4VKY7	Schistosoma mansoni (Blood fluke)
	1225	G4VTA6	Schistosoma mansoni (Blood fluke)
	1226	G4VTI2	Schistosoma mansoni (Blood fluke)
	1227	G4LWG8	Schistosoma mansoni (Blood fluke)
	1228	G4M2A8	Schistosoma mansoni (Blood fluke)
	1229	G4M0K2	Schistosoma mansoni (Blood fluke)
	1230	G4M0R4	Schistosoma mansoni (Blood fluke)
	1231	G4V685	Schistosoma mansoni (Blood fluke)
	1232	G4V9Y7	Schistosoma mansoni (Blood fluke)
	1233	G4V8G3	Schistosoma mansoni (Blood fluke)
	1234	G4V8I6	Schistosoma mansoni (Blood fluke)
	1235	G4V8X7	Schistosoma mansoni (Blood fluke)
	1236	G4VLV6	Schistosoma mansoni (Blood fluke)
	1237	G4VQ93	Schistosoma mansoni (Blood fluke)
	1238	G4VQL7	Schistosoma mansoni (Blood fluke)
	1239	G4VRE0	Schistosoma mansoni (Blood fluke)
	1240	G4VEU5	Schistosoma mansoni (Blood fluke)
	1241	G4VE46	Schistosoma mansoni (Blood fluke)
	1242	G4M0Q2	Schistosoma mansoni (Blood fluke)
	1243	G4VPV8	Schistosoma mansoni (Blood fluke)
	1244	G4VNF8	Schistosoma mansoni (Blood fluke)
	1245	G4VL59	Schistosoma mansoni (Blood fluke)
	1246	G4V6Y5	Schistosoma mansoni (Blood fluke)
	1247	C1M2S3	Schistosoma mansoni (Blood fluke)
	1248	G4V855	Schistosoma mansoni (Blood fluke)
	1249	G4VHK7	Schistosoma mansoni (Blood fluke)
	1250	G4VLB7	Schistosoma mansoni (Blood fluke)
	1251	G4VTW2	Schistosoma mansoni (Blood fluke)
	1252	G4VT89	Schistosoma mansoni (Blood fluke)
	1253	G4VLD6	Schistosoma mansoni (Blood fluke)
	1254	G4V9E5	Schistosoma mansoni (Blood fluke)
	1255	G4V844	Schistosoma mansoni (Blood fluke)
	1256	G4VD93	Schistosoma mansoni (Blood fluke)
	1257	G4VQ42	Schistosoma mansoni (Blood fluke)
	1258	G4VTI0	Schistosoma mansoni (Blood fluke)
	1259	G4VES5	Schistosoma mansoni (Blood fluke)
	1260	G4M0Q1	Schistosoma mansoni (Blood fluke)
	1261	G4V7C9	Schistosoma mansoni (Blood fluke)
	1262	G4VT47	Schistosoma mansoni (Blood fluke)
	1263	G4VIM2	Schistosoma mansoni (Blood fluke)
	1264	G4VMZ2	Schistosoma mansoni (Blood fluke)
	1265	G4VGC2	Schistosoma mansoni (Blood fluke)
	1266	G4VIM3	Schistosoma mansoni (Blood fluke)
	1267	G4VN84	Schistosoma mansoni (Blood fluke)
	1268	G4LVU8	Schistosoma mansoni (Blood fluke)
	1269	G4LVM8	Schistosoma mansoni (Blood fluke)
	1270	G4VE00	Schistosoma mansoni (Blood fluke)
	1271	G4VLJ9	Schistosoma mansoni (Blood fluke)
	1272	G4VAL3	Schistosoma mansoni (Blood fluke)
	1273	G4LYX0	Schistosoma mansoni (Blood fluke)
	1274	G4VLE3	Schistosoma mansoni (Blood fluke)
	1275	G4VKP6	Schistosoma mansoni (Blood fluke)
	1276	G4VT48	Schistosoma mansoni (Blood fluke)
	1277	G4LW11	Schistosoma mansoni (Blood fluke)
	1278	G4LUP3	Schistosoma mansoni (Blood fluke)
	1279	G4VAY0	Schistosoma mansoni (Blood fluke)
	1280	G4VMS4	Schistosoma mansoni (Blood fluke)
	1281	G4M181	Schistosoma mansoni (Blood fluke)
	1282	G4VBT7	Schistosoma mansoni (Blood fluke)
	1283	G4M084	Schistosoma mansoni (Blood fluke)
	1284	G4VJV4	Schistosoma mansoni (Blood fluke)
	1285	G4VSZ4	Schistosoma mansoni (Blood fluke)
	1286	G4LWB5	Schistosoma mansoni (Blood fluke)
	1287	G4VEJ0	Schistosoma mansoni (Blood fluke)
	1288	G4VLG5	Schistosoma mansoni (Blood fluke)
	1289	G4VLE4	Schistosoma mansoni (Blood fluke)
	1290	G4M018	Schistosoma mansoni (Blood fluke)
	1291	G4LZD3	Schistosoma mansoni (Blood fluke)
	1292	G4VCE4	Schistosoma mansoni (Blood fluke)
	1293	G4VKB8	Schistosoma mansoni (Blood fluke)
	1294	G4V6K2	Schistosoma mansoni (Blood fluke)
	1295	G4VNR5	Schistosoma mansoni (Blood fluke)
	1296	G4VT09	Schistosoma mansoni (Blood fluke)
	1297	G4LVZ3	Schistosoma mansoni (Blood fluke)
	1298	G4M010	Schistosoma mansoni (Blood fluke)
	1299	G4V7H2	Schistosoma mansoni (Blood fluke)
	1300	G4V8Q1	Schistosoma mansoni (Blood fluke)
	1301	G4VC63	Schistosoma mansoni (Blood fluke)
	1302	G4VGR6	Schistosoma mansoni (Blood fluke)
	1303	G4VIV2	Schistosoma mansoni (Blood fluke)
	1304	G4V9G6	Schistosoma mansoni (Blood fluke)
	1305	G4VD57	Schistosoma mansoni (Blood fluke)
	1306	G4VNR6	Schistosoma mansoni (Blood fluke)
	1307	G4VJV5	Schistosoma mansoni (Blood fluke)
	1308	C4QTY8	Schistosoma mansoni (Blood fluke)
	1309	G4M080	Schistosoma mansoni (Blood fluke)
	1310	G4VN51	Schistosoma mansoni (Blood fluke)
	1311	G4VRS4	Schistosoma mansoni (Blood fluke)
	1312	G4VDY6	Schistosoma mansoni (Blood fluke)
	1313	G4VNG4	Schistosoma mansoni (Blood fluke)
	1314	G4V8X4	Schistosoma mansoni (Blood fluke)
	1315	G4VGJ8	Schistosoma mansoni (Blood fluke)
	1316	G4V857	Schistosoma mansoni (Blood fluke)
	1317	G4VCI3	Schistosoma mansoni (Blood fluke)
	1318	G4VMQ2	Schistosoma mansoni (Blood fluke)
	1319	G4LVT7	Schistosoma mansoni (Blood fluke)
	1320	G4LW12	Schistosoma mansoni (Blood fluke)
	1321	G4V6J6	Schistosoma mansoni (Blood fluke)
	1322	G4VNQ3	Schistosoma mansoni (Blood fluke)
	1323	G4VTH4	Schistosoma mansoni (Blood fluke)
	1324	G4VC23	Schistosoma mansoni (Blood fluke)
	1325	G4VHL0	Schistosoma mansoni (Blood fluke)
	1326	G4VLI9	Schistosoma mansoni (Blood fluke)
	1327	G4LUD3	Schistosoma mansoni (Blood fluke)
	1328	Q26607	Schistosoma mansoni (Blood fluke)
	1329	G4V7A4	Schistosoma mansoni (Blood fluke)
	1330	G4VB27	Schistosoma mansoni (Blood fluke)
	1331	G4VIM5	Schistosoma mansoni (Blood fluke)
	1332	G4VFE7	Schistosoma mansoni (Blood fluke)
	1333	G4LVX4	Schistosoma mansoni (Blood fluke)
	1334	G4VNW4	Schistosoma mansoni (Blood fluke)
	1335	G4VMG9	Schistosoma mansoni (Blood fluke)
	1336	G4LUY9	Schistosoma mansoni (Blood fluke)
	1337	G4LUL8	Schistosoma mansoni (Blood fluke)
	1338	G4V6G8	Schistosoma mansoni (Blood fluke)
	1339	G4LX56	Schistosoma mansoni (Blood fluke)
	1340	G4VN04	Schistosoma mansoni (Blood fluke)
	1341	G4V8X5	Schistosoma mansoni (Blood fluke)
	1342	G4VHV6	Schistosoma mansoni (Blood fluke)
	1343	G4VN53	Schistosoma mansoni (Blood fluke)
	1344	G4V9N7	Schistosoma mansoni (Blood fluke)
	1345	G4VGE5	Schistosoma mansoni (Blood fluke)
	1346	G4M0D2	Schistosoma mansoni (Blood fluke)
	1347	C4QEK9	Schistosoma mansoni (Blood fluke)
	1348	G4VAI9	Schistosoma mansoni (Blood fluke)
	1349	G4M0V8	Schistosoma mansoni (Blood fluke)
	1350	G4VLD7	Schistosoma mansoni (Blood fluke)
	1351	G4VDL4	Schistosoma mansoni (Blood fluke)
	1352	G4LUA5	Schistosoma mansoni (Blood fluke)
	1353	G4VI99	Schistosoma mansoni (Blood fluke)
	1354	G4VDT3	Schistosoma mansoni (Blood fluke)
	1355	G4LZW4	Schistosoma mansoni (Blood fluke)
	1356	G4VIM4	Schistosoma mansoni (Blood fluke)
	1357	G4LV54	Schistosoma mansoni (Blood fluke)
	1358	G4VMN7	Schistosoma mansoni (Blood fluke)
	1359	G4VTW4	Schistosoma mansoni (Blood fluke)
	1360	G4V5M9	Schistosoma mansoni (Blood fluke)
	1361	G4VAV6	Schistosoma mansoni (Blood fluke)
	1362	Q69G16	Schistosoma mansoni (Blood fluke)
	1363	G4VIQ7	Schistosoma mansoni (Blood fluke)
	1364	G4V8F0	Schistosoma mansoni (Blood fluke)
	1365	G4M009	Schistosoma mansoni (Blood fluke)
	1366	G4VKC5	Schistosoma mansoni (Blood fluke)
	1367	G4LUW1	Schistosoma mansoni (Blood fluke)
	1368	G4VKG4	Schistosoma mansoni (Blood fluke)
	1369	G4VQA5	Schistosoma mansoni (Blood fluke)
	1370	G4VTP5	Schistosoma mansoni (Blood fluke)
	1371	G4VAN8	Schistosoma mansoni (Blood fluke)
	1372	G4VH38	Schistosoma mansoni (Blood fluke)
	1373	G4VCM6	Schistosoma mansoni (Blood fluke)
	1374	G4VDF3	Schistosoma mansoni (Blood fluke)
	1375	G4VMK9	Schistosoma mansoni (Blood fluke)
	1376	C4Q6M8	Schistosoma mansoni (Blood fluke)
	1377	Q86LZ8	Schistosoma mansoni (Blood fluke)
	1378	G4V9D3	Schistosoma mansoni (Blood fluke)
	1379	G4V9H4	Schistosoma mansoni (Blood fluke)
	1380	G4V6J0	Schistosoma mansoni (Blood fluke)
	1381	G4VIF7	Schistosoma mansoni (Blood fluke)
	1382	G4V8Y7	Schistosoma mansoni (Blood fluke)
	1383	G4V8F9	Schistosoma mansoni (Blood fluke)
	1384	G4VM65	Schistosoma mansoni (Blood fluke)
	1385	G4M1C3	Schistosoma mansoni (Blood fluke)
	1386	E5RX10	Nippostrongylus brasiliensis (Rat hookworm)
	1387	D3KZ66	Nippostrongylus brasiliensis (Rat hookworm)
